# Supplementary material for: Earth abundant metal complexes of donor functionalised N-heterocyclic carbene ligands: synthesis, characterisation and application as amination catalysts
Source: Royal Society of Chemistry journal article supplement (doi:10.1039/c6nj01118g), 2016-01-01
Supplement: c6nj01118g1.pdf [file c6nj01118g1.pdf]

**Earth abundant metal complexes of donor functionalised *N*-heterocyclic carbene ligands:  
synthesis, characterization and application as amination catalysts**

**Halliru Ibrahim, Muhammad Dabai Bala\***

New Journal of Chemistry

Supplementary Material

**Analyses data for synthesized imidazolium salts and Ag-, Ni- & Co-NHC complexes**

|                                                                                                                                       |           |
|---------------------------------------------------------------------------------------------------------------------------------------|-----------|
| <b>ANALYSES DATA for SYNTHESIZED IMIDAZOLIUM SALTS and Ag-, Ni- &amp; Co-NHC COMPLEXES .....</b>                                      | <b>1</b>  |
| <b>DATA FOR FUNCTIONALISED IMIDAZOLIUM SALTS WITH PICOLYL MOIETY (1) .....</b>                                                        | <b>3</b>  |
| FIGURE S1: <sup>1</sup> H NMR SPECTRUM OF 1-(4-NITROPHENYL)-3-(PYRIDINE-2-YLMETHYL)-1H-IMIDAZOL-3-IUM BROMIDE (1A). .....             | 3         |
| FIGURE S2: <sup>13</sup> C NMR SPECTRUM OF 1A. ....                                                                                   | 3         |
| FIGURE S3: HRMS SPECTRUM OF 1A. ....                                                                                                  | 4         |
| FIGURE S4: <sup>1</sup> H NMR SPECTRUM OF 1-(4-ACETYLPHENYL)-3-(PYRIDINE-2-YLMETHYL)-1H-IMIDAZOL-3-IUM BROMIDE (1B). .....            | 4         |
| FIGURE S5: EXPANDED <sup>1</sup> H NMR SPECTRUM OF 1B. ....                                                                           | 5         |
| FIGURE S6: <sup>13</sup> C NMR SPECTRUM OF 1B. ....                                                                                   | 5         |
| FIGURE S7: HRMS SPECTRUM OF 1B. ....                                                                                                  | 6         |
| FIGURE S8: <sup>1</sup> H NMR SPECTRUM FOR 3-(4-CYANOPHENYL)-1-(2-PYRIDYLMETHYL)IMIDAZOLIUM BROMIDE (1C). ....                        | 6         |
| FIGURE S9: EXPANDED <sup>1</sup> H NMR SPECTRUM OF 1C. ....                                                                           | 6         |
| FIGURE S10: EXPANDED <sup>13</sup> C NMR SPECTRUM OF 1C. ....                                                                         | 7         |
| FIGURE S11: <sup>13</sup> C NMR SPECTRUM OF 1C. ....                                                                                  | 7         |
| FIGURE S12: HRMS SPECTRUM OF 1C. ....                                                                                                 | 7         |
| FIGURE S13: 1H NMR SPECTRUM FOR 3-ALLYL-1-(2-PYRIDYLMETHYL)IMIDAZOLIUM BROMIDE (1D). ....                                             | 8         |
| FIGURE S14: <sup>13</sup> C NMR SPECTRUM OF 1D. ....                                                                                  | 8         |
| FIGURE S15: HRMS SPECTRUM OF 1D. ....                                                                                                 | 9         |
| FIGURE S16: <sup>1</sup> H NMR SPECTRUM OF 3-BUTENYL-1-(2-PYRIDYLMETHYL)IMIDAZOLIUM BROMIDE (1E). ....                                | 9         |
| FIGURE S17: <sup>13</sup> C NMR SPECTRUM OF 1E. ....                                                                                  | 10        |
| FIGURE S18: HRMS SPECTRUM OF 1E. ....                                                                                                 | 10        |
| FIGURE S19: <sup>1</sup> H NMR SPECTRUM OF 3-PENTENYL-1-(2-PYRIDYLMETHYL)IMIDAZOLIUM BROMIDE (1F). ....                               | 11        |
| FIGURE S20: EXPANDED <sup>1</sup> H NMR SPECTRUM OF 1F SHOWING THE AROMATIC REGION. ....                                              | 11        |
| FIGURE S21: <sup>13</sup> C NMR SPECTRUM OF 1F. ....                                                                                  | 11        |
| FIGURE S22: HRMS SPECTRUM OF 1F. ....                                                                                                 | 12        |
| <b>DATA FOR PICOLYL FUNCTIONALISED IMIDAZOL-2-YLIDENE(NHC)-AG(I) COMPLEXES (2) .....</b>                                              | <b>13</b> |
| FIGURE S23: <sup>1</sup> H NMR SPECTRUM FOR [1-(4-NITROPHENYL)-3-(2-PYRIDYL)IMIDAZOL-2-YLIDENE]SILVER CHLORIDE (2A). ....             | 13        |
| FIGURE S24: EXPANDED <sup>1</sup> H NMR SPECTRUM OF 2A. ....                                                                          | 13        |
| FIGURE S25: COMPARATIVE <sup>1</sup> H NMR SPECTRA OF 1A (TOP) AND 2A (BOTTOM). ....                                                  | 13        |
| FIGURE S26: <sup>13</sup> C NMR SPECTRUM OF 2A. ....                                                                                  | 14        |
| FIGURE S27: COMPARATIVE <sup>13</sup> C NMR SPECTRA OF 1A AND 2A. ....                                                                | 14        |
| FIGURE S28: TOF MS-ES <sup>+</sup> SPECTRUM OF 2A. ....                                                                               | 15        |
| <b>DATA FOR PICOLYL FUNCTIONALISED IMIDAZOL-2-YLIDENE(NHC)-NI(II) AND CO(II) COMPLEXES (3).....</b>                                   | <b>16</b> |
| FIGURE S29: <sup>1</sup> H NMR SPECTRUM OF CO[3-(4-NITROPHENYL)-1-PICOLYIMIDAZOLIN-2-YLIDENE] <sub>2</sub> Cl <sub>2</sub> (3A). .... | 16        |
| FIGURE S30: COMPARATIVE <sup>1</sup> H NMR SPECTRA OF 3A (TOP) AND 2A (BOTTOM). ....                                                  | 16        |

\*Correspondence to: e-mail: [bala@ukzn.ac.za](mailto:bala@ukzn.ac.za); fax: +27 31 260 3091.

|                                                                                                                                      |           |
|--------------------------------------------------------------------------------------------------------------------------------------|-----------|
| FIGURE S31: $^{13}\text{C}$ NMR SPECTRUM OF 3A.....                                                                                  | 17        |
| FIGURE S32: COMPARATIVE $^{13}\text{C}$ NMR SPECTRA OF 2A (TOP) AND 3A (BOTTOM). ....                                                | 17        |
| FIGURE S33: MS-ES <sup>+</sup> SPECTRUM (1) OF 3A.....                                                                               | 18        |
| FIGURE S34: $^1\text{H}$ NMR SPECTRUM OF Ni[3-(4-NITROPHENYL)-1-PICOLYIMIDAZOLIN-2-YLIDENE] <sub>2</sub> Cl <sub>2</sub> (3A'). .... | 18        |
| FIGURE S35: HRMS SPECTRUM OF 3A'.....                                                                                                | 19        |
| FIGURE S36: $^1\text{H}$ NMR SPECTRUM OF Co(3-ALLYL-1-PICOLYIMIDAZOLIN-2-YLIDENE) <sub>2</sub> Cl <sub>2</sub> (3D).....             | 19        |
| FIGURE S37: COMPARATIVE $^1\text{H}$ NMR SPECTRA OF 3D (TOP) AND 1D (BOTTOM).....                                                    | 20        |
| FIGURE S38: TOF MS-ES <sup>+</sup> SPECTRUM OF 3D.....                                                                               | 20        |
| FIGURE S39: $^1\text{H}$ NMR SPECTRUM OF Ni(3-ALLYL-1-PICOLYIMIDAZOLIN-2-YLIDENE) <sub>2</sub> Cl <sub>2</sub> (3D').....            | 20        |
| FIGURE S40: COMPARATIVE $^1\text{H}$ NMR SPECTRA OF 3D' (TOP) AND 1D (BOTTOM).....                                                   | 21        |
| FIGURE S41: TOF MS-ES <sup>+</sup> SPECTRUM OF 3D'.....                                                                              | 21        |
| FIGURE S42: $^1\text{H}$ NMR SPECTRUM OF Co(3-BUTENYL-1-PICOLYIMIDAZOLIN-2-YLIDENE) <sub>2</sub> Cl <sub>2</sub> (3E).....           | 21        |
| FIGURE S43: TOF MS-ES <sup>+</sup> SPECTRUM OF 3E.....                                                                               | 22        |
| FIGURE S44: $^1\text{H}$ NMR SPECTRUM OF Ni(3-BUTENYL-1-PICOLYIMIDAZOLIN-2-YLIDENE) <sub>2</sub> Cl <sub>2</sub> (3E').....          | 22        |
| FIGURE S45: TOF MS-ES <sup>+</sup> SPECTRUM OF 3E'.....                                                                              | 23        |
| <b>ANALYSIS DATA FOR SUBSTRATES AND ISOLATED PRODUCTS.....</b>                                                                       | <b>24</b> |
| DIPHENYL AMINE: .....                                                                                                                | 24        |
| 4-METHOXY- <i>N</i> -PHENYLBENZENAMINE:.....                                                                                         | 24        |
| 2-METHOXY- <i>N</i> -PHENYLBENZENAMINE:.....                                                                                         | 24        |
| 4-METHOXY- <i>N</i> -(3,5-DIMETHYLPHENYL)BENZENAMINE:.....                                                                           | 25        |
| 4-(PHENYLAMINO)BENZONITRILE:.....                                                                                                    | 25        |
| 3,5-DIMETHYL- <i>N</i> -PHENYLBENZENAMINE: .....                                                                                     | 25        |
| 2-METHYL- <i>N</i> -PHENYLBENZENAMINE: .....                                                                                         | 25        |
| BIPHENYL: .....                                                                                                                      | 26        |
| <b>NMR SPECTRA FOR ARYL AMINE SUBSTRATES AND ISOLATED ARYLATED PRODUCTS.....</b>                                                     | <b>27</b> |
| FIGURE S46: $^1\text{H}$ NMR SPECTRUM OF ANILINE. ....                                                                               | 27        |
| FIGURE S47: $^1\text{H}$ NMR SPECTRUM OF 4-METHOXYBENZENAMINE. ....                                                                  | 27        |
| FIGURE S48: $^1\text{H}$ NMR (HALFLOID) SPECTRUM FOR DIPHENYLAMINE. ....                                                             | 27        |
| FIGURE S49: $^{13}\text{C}$ NMR FOR DIPHENYLAMINE. ....                                                                              | 28        |
| FIGURE S51: $^{13}\text{C}$ NMR SPECTRUM FOR 2-METHOXY- <i>N</i> -PHENYLBENZENAMINE. ....                                            | 28        |
| FIGURE S52: $^1\text{H}$ NMR SPECTRUM FOR 2-METHYL- <i>N</i> -PHENYLBENZENAMINE.....                                                 | 29        |
| FIGURE S53: $^{13}\text{C}$ NMR SPECTRUM FOR 2-METHYL- <i>N</i> -PHENYLBENZENAMINE.....                                              | 29        |
| FIGURE S54: $^1\text{H}$ NMR SPECTRUM FOR 4-METHOXY- <i>N</i> -PHENYLBENZENAMINE. ....                                               | 29        |
| FIGURE S55: $^1\text{H}$ NMR (EXPANDED) SPECTRUM FOR 4-METHOXY- <i>N</i> -PHENYLBENZENAMINE. ....                                    | 30        |
| FIGURE S56: $^{13}\text{C}$ NMR SPECTRUM FOR 4-METHOXY- <i>N</i> -PHENYLBENZENAMINE. ....                                            | 30        |
| FIGURE S57: $^1\text{H}$ NMR SPECTRUM FOR 4-METHOXY- <i>N</i> -(3,5-DIMETHYLPHENYL)BENZENAMINE. ....                                 | 30        |
| FIGURE S58: EXPANDED $^1\text{H}$ NMR SPECTRUM FOR 4-METHOXY- <i>N</i> -(3,5-DIMETHYLPHENYL)BENZENAMINE.....                         | 31        |
| FIGURE S59: $^{13}\text{C}$ NMR SPECTRUM FOR 4-METHOXY- <i>N</i> -(3,5-DIMETHYLPHENYL)BENZENAMINE. ....                              | 31        |
| FIGURE S60: $^1\text{H}$ NMR SPECTRUM FOR 4-(PHENYLAMINO)BENZONITRILE. ....                                                          | 31        |
| FIGURE S61: $^{13}\text{C}$ NMR SPECTRUM FOR 4-(PHENYLAMINO)BENZONITRILE. ....                                                       | 32        |
| FIGURE S62: $^1\text{H}$ NMR SPECTRUM FOR 3,5-DIMETHYL- <i>N</i> -PHENYLBENZENAMINE.....                                             | 32        |
| FIGURE S63: $^{13}\text{C}$ NMR SPECTRUM FOR 3,5-DIMETHYL- <i>N</i> -PHENYLBENZENAMINE.....                                          | 32        |
| FIGURE S64: $^1\text{H}$ NMR SPECTRUM FOR BIPHENYL. ....                                                                             | 33        |
| <b>MAGNETIC SUSCEPTIBILITY MEASUREMENTS FOR THE PARAMAGNETIC COMPOUNDS 3D AND 3E .....</b>                                           | <b>34</b> |
| HYSTERESIS LOOP MEASUREMENT EXPERIMENT RESULTS FOR Co(3-ALLYL-1-PICOLYIMIDAZOLIN-2-YLIDENE) <sub>2</sub> Cl <sub>2</sub> (3D).....   | 34        |
| HYSTERESIS LOOP MEASUREMENT EXPERIMENT RESULTS FOR Co(3-BUTENYL-1-PICOLYIMIDAZOLIN-2-YLIDENE) <sub>2</sub> Cl <sub>2</sub> (3E)..... | 41        |

Data for functionalised imidazolium salts with picolyl moiety (1)

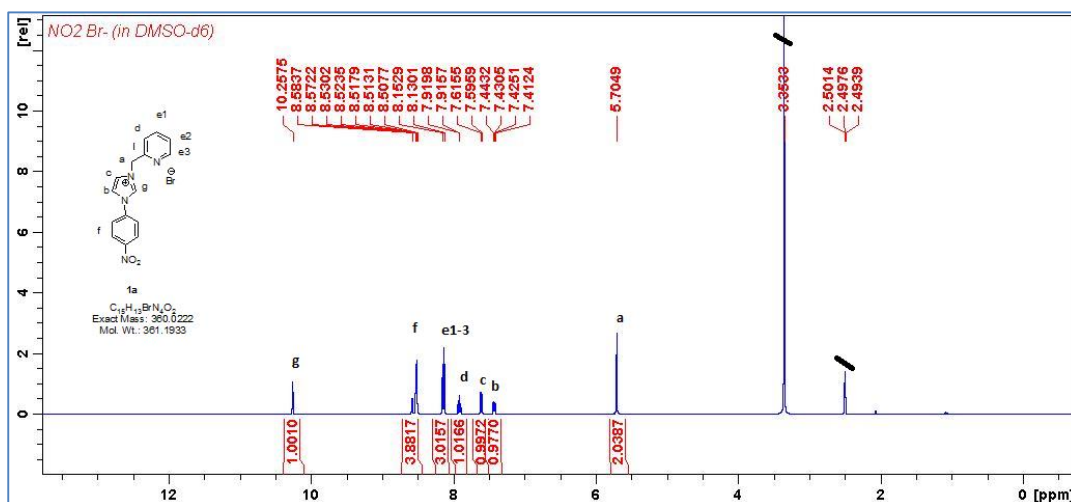

Figure S1: <sup>1</sup>H NMR spectrum of 1-(4-nitrophenyl)-3-(pyridine-2-ylmethyl)-1H-imidazol-3-ium bromide (1a).

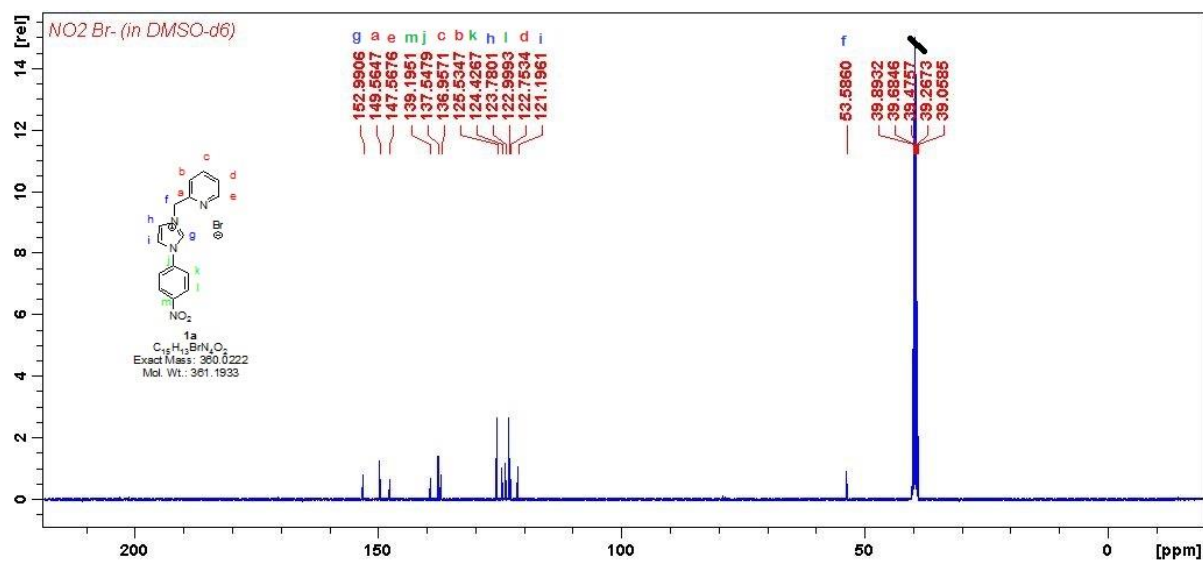

Figure S2: <sup>13</sup>C NMR spectrum of 1a.

### Elemental Composition Report

Page 1

#### Single Mass Analysis

Tolerance = 50.0 PPM / DBE: min = -1.5, max = 100.0

Element prediction: Off

Number of isotope peaks used for i-FIT = 3

Monoisotopic Mass, Even Electron Ions

18 formula(e) evaluated with 1 results within limits (up to 50 best isotopic matches for each mass)

Elements Used:

C: 10-15 H: 10-15 N: 0-5 O: 0-5

NO2Br- 2 (0.017) Cm (1:15)

TOF MS ES+

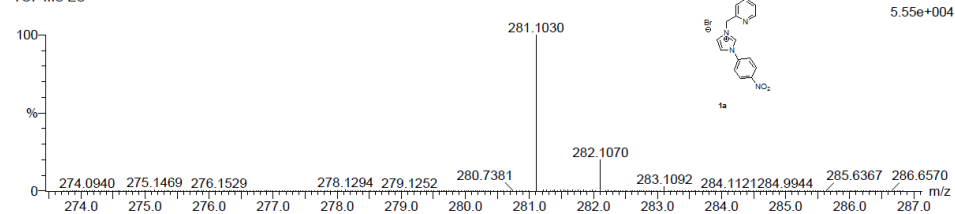

| Mass     | Calc. Mass | mDa  | PPM  | DBE  | i-FIT | i-FIT (Norm) | Formula       |
|----------|------------|------|------|------|-------|--------------|---------------|
| 281.1030 | 281.1039   | -0.9 | -3.2 | 11.5 | 476.3 | 0.0          | C15 H13 N4 O2 |

Figure S3: HRMS spectrum of 1a.

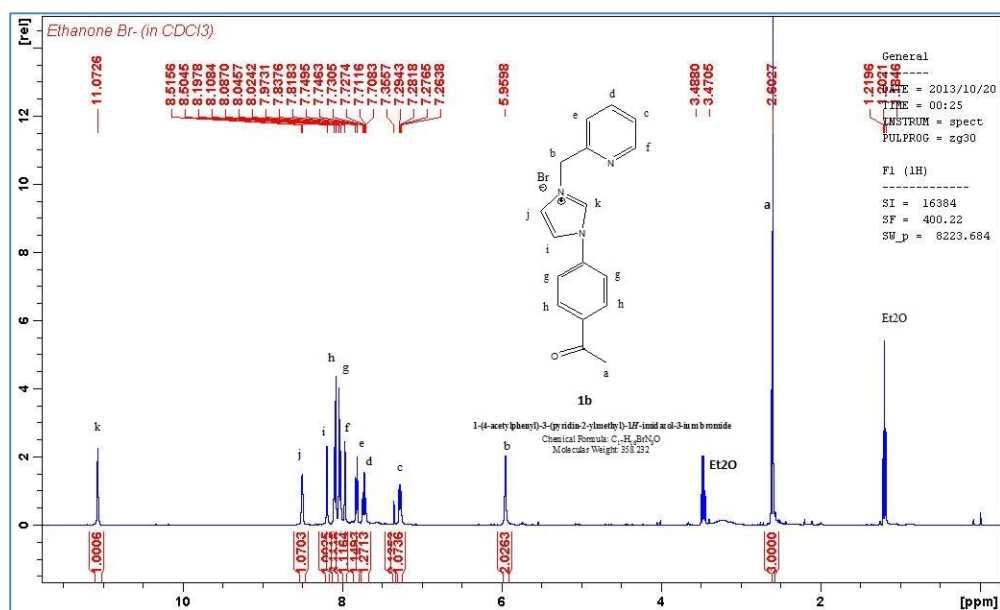

Figure S4: <sup>1</sup>H NMR spectrum of 1-(4-acetylphenyl)-3-(pyridine-2-ylmethyl)-1H-imidazol-3-ium bromide (1b).

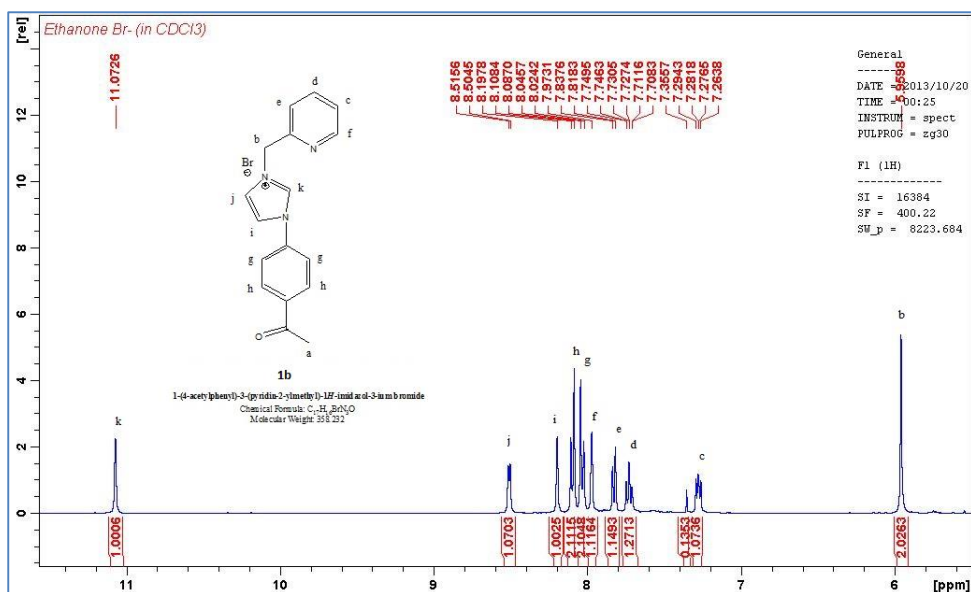

Figure S5: Expanded  $^1\text{H}$  NMR spectrum of 1b.

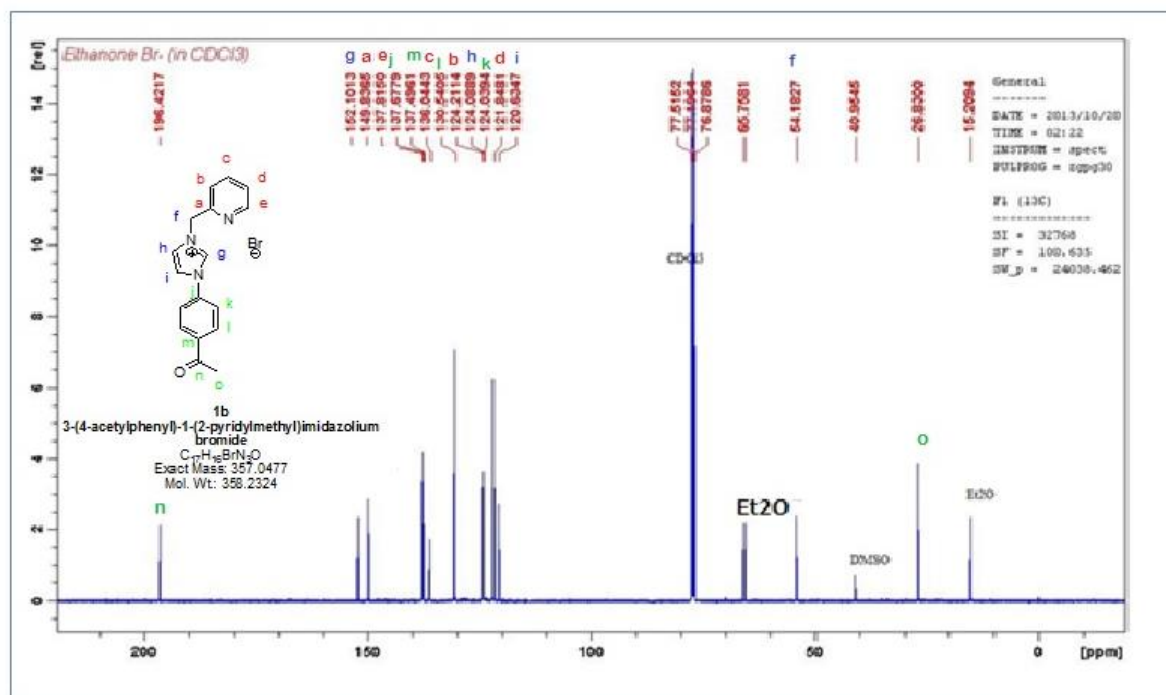

Figure S6:  $^{13}\text{C}$  NMR spectrum of 1b.

Elemental Composition Report

Page 1

Single Mass Analysis

Tolerance = 5.0 PPM / DBE: min = -1.5, max = 100.0

Element prediction: Off

Number of isotope peaks used for i-FIT = 3

Monoisotopic Mass, Even Electron Ions

18 formula(e) evaluated with 1 results within limits (up to 50 best isotopic matches for each mass)

Elements Used:

C: 15-20 H: 15-20 N: 0-5 O: 0-5

EthanolBr-2 (0.017) Cm (1:16)

TOF MS ES+

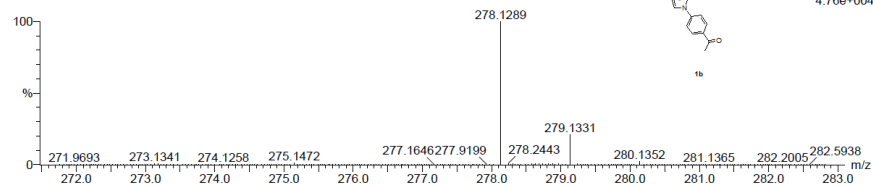

| Mass     | Calc. Mass | mDa  | PPM  | DBE  | i-FIT | i-FIT (Norm) | Formula      |
|----------|------------|------|------|------|-------|--------------|--------------|
| 278.1289 | 278.1293   | -0.4 | -1.4 | 11.5 | 452.7 | 0.0          | C17 H16 N3 O |

Figure S7: HRMS spectrum of 1b.

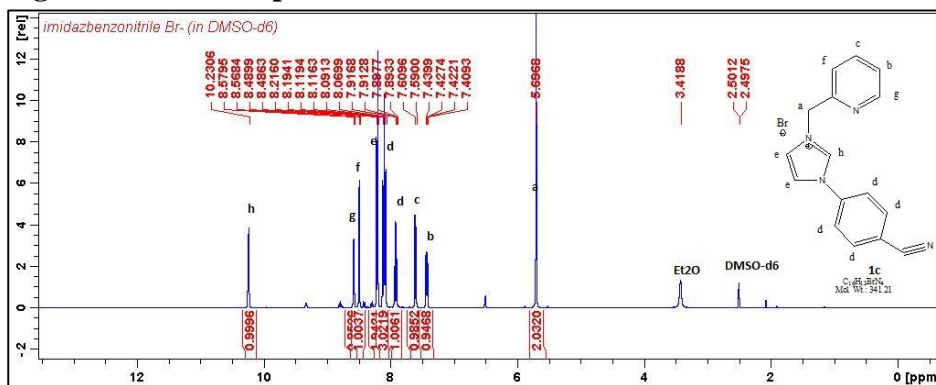

Figure S8: <sup>1</sup>H NMR spectrum for 3-(4-cyanophenyl)-1-(2-pyridylmethyl)imidazolium bromide (1c).

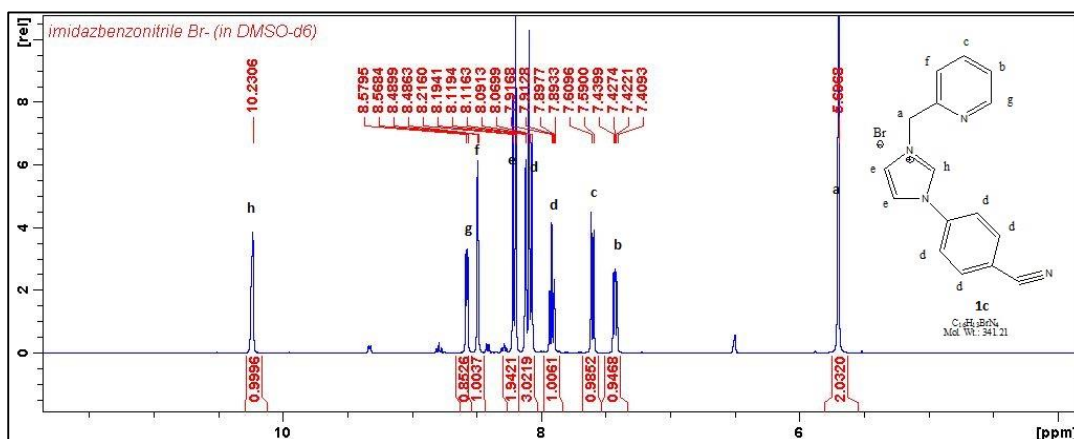

Figure S9: Expanded <sup>1</sup>H NMR spectrum of 1c.

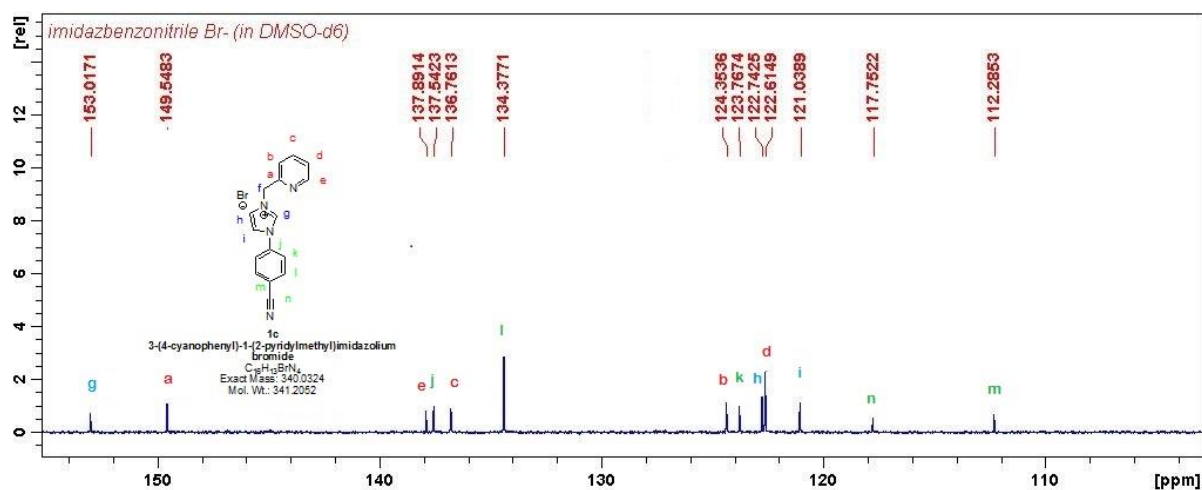

Figure S10: Expanded  $^{13}C$  NMR spectrum of 1c.

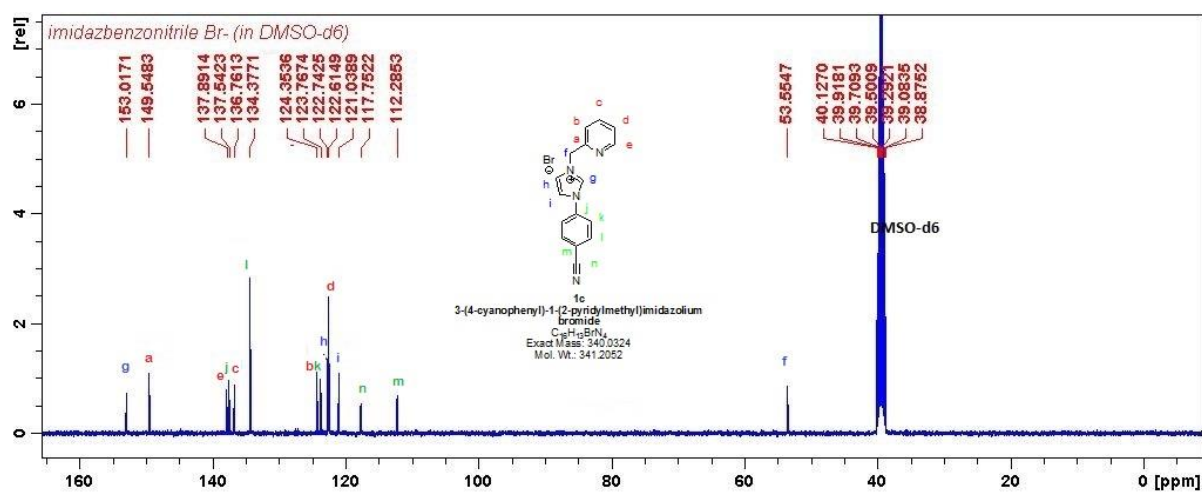

Figure S11:  $^{13}C$  NMR spectrum of 1c.

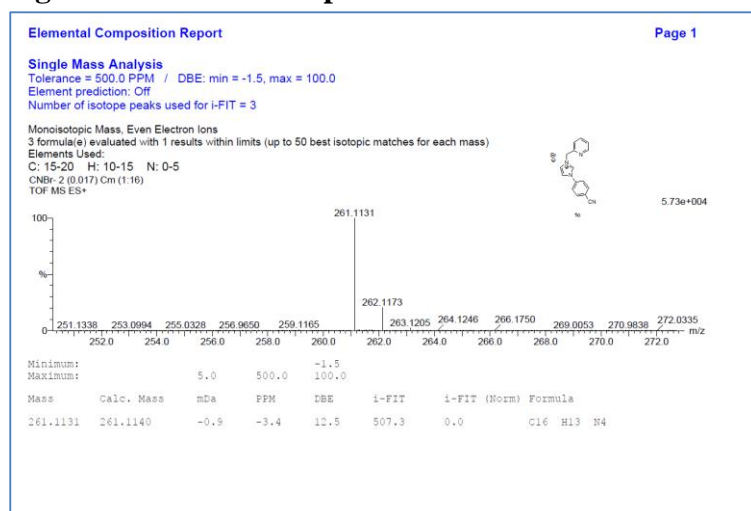

Figure S12: HRMS spectrum of 1c.

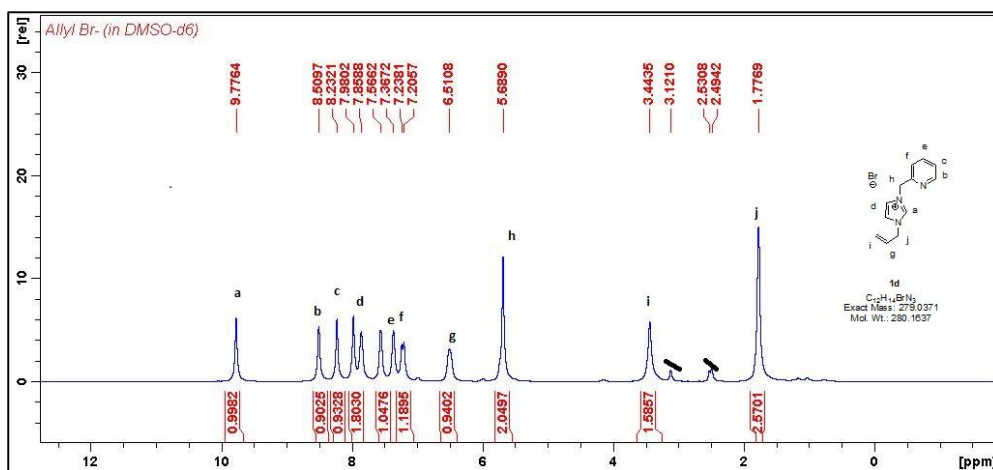

Figure S13:  $^1\text{H}$  NMR spectrum for 3-allyl-1-(2-pyridylmethyl)imidazolium bromide (1d).

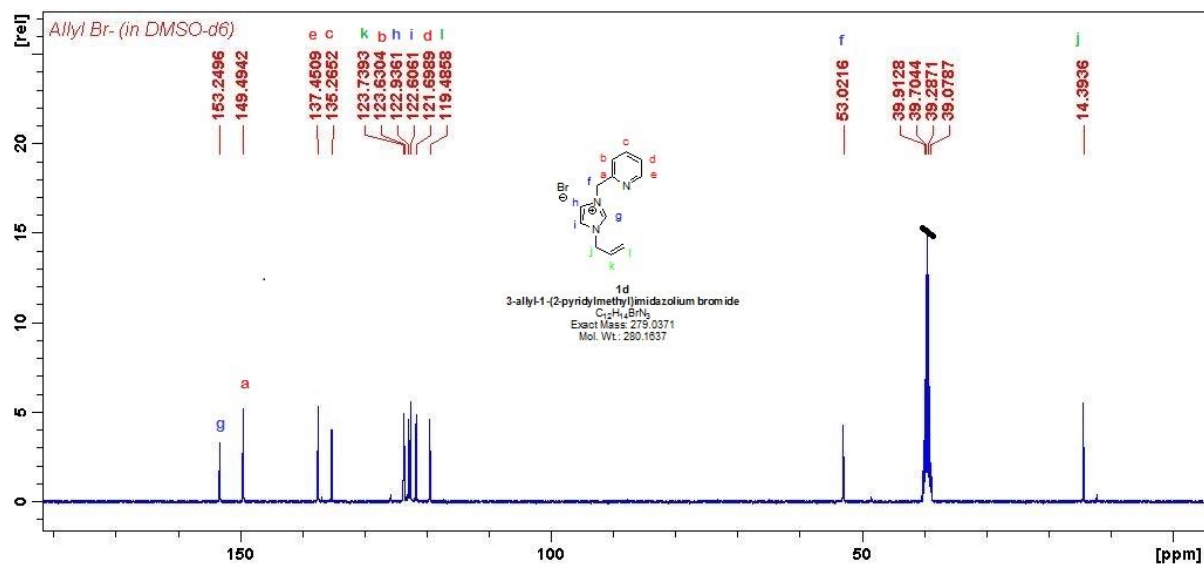

Figure S14:  $^{13}\text{C}$  NMR spectrum of 1d.



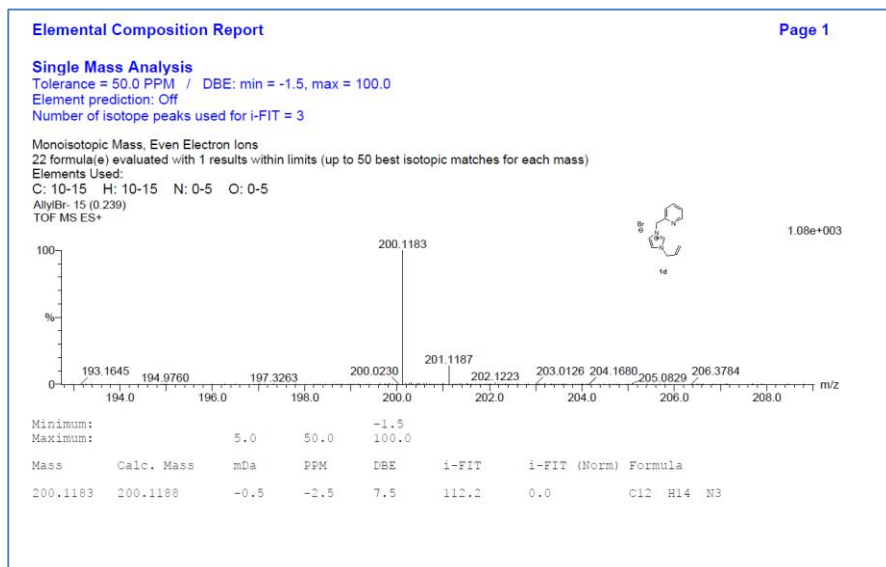

**Figure S15: HRMS spectrum of 1d.**

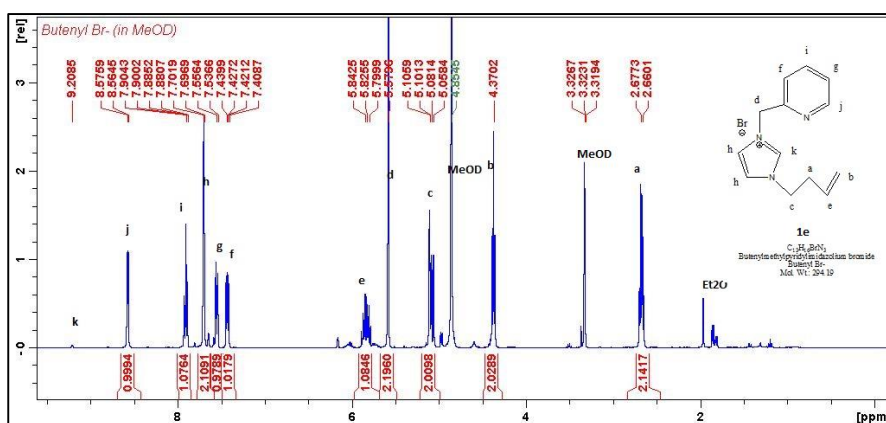

**Figure S16: <sup>1</sup>H NMR spectrum of 3-butenyl-1-(2-pyridylmethyl)imidazolium bromide (1e).**

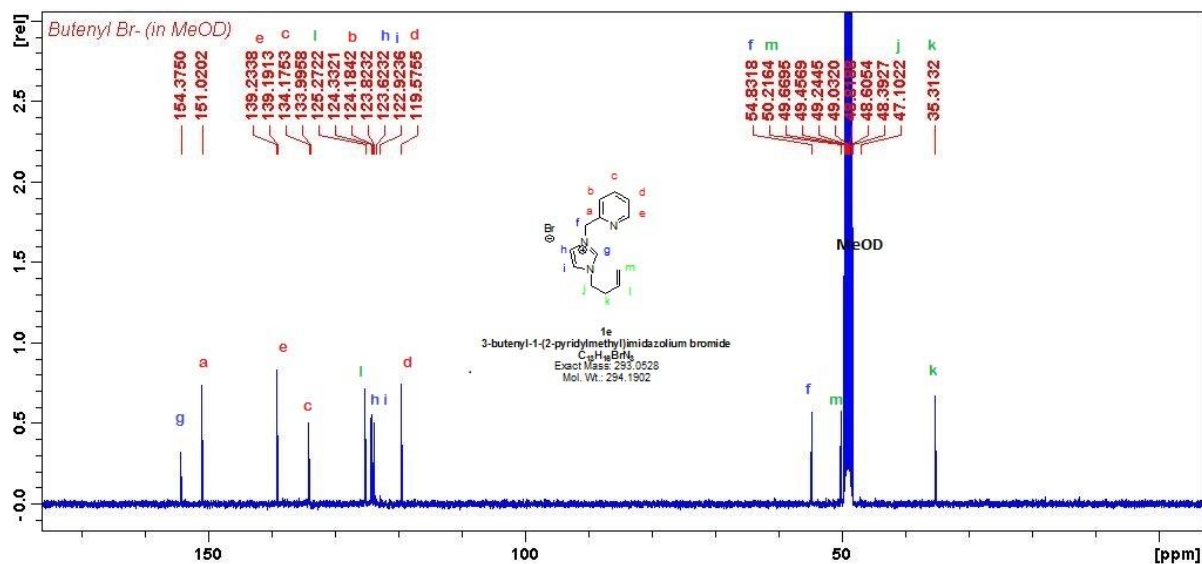

Figure S17:  $^{13}\text{C}$  NMR spectrum of 1e.

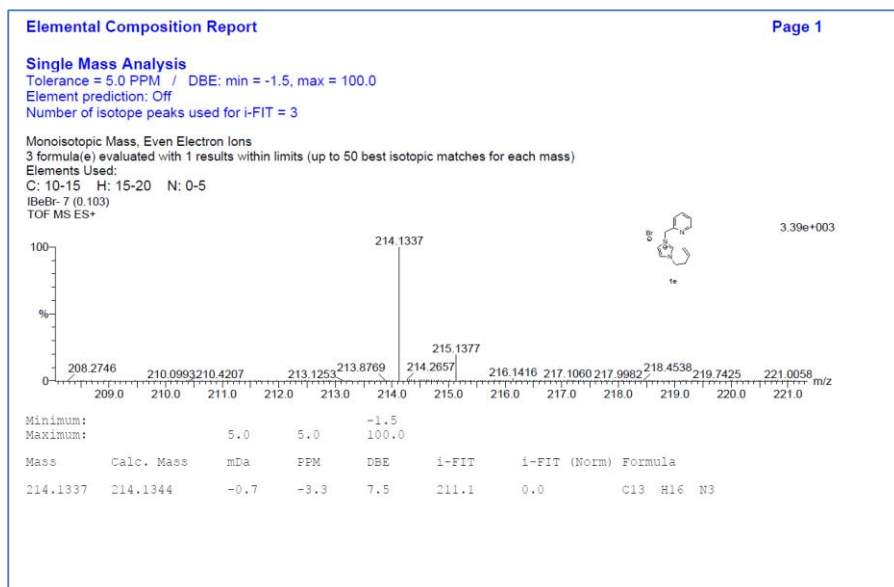

Figure S18: HRMS spectrum of 1e.

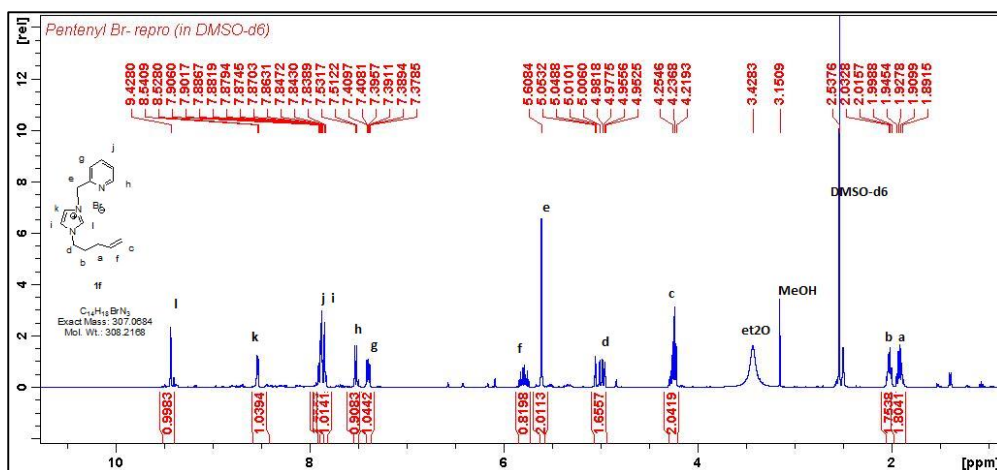

Figure S19:  $^1\text{H}$  NMR spectrum of 3-pentenyl-1-(2-pyridylmethyl)imidazolium bromide (1f).

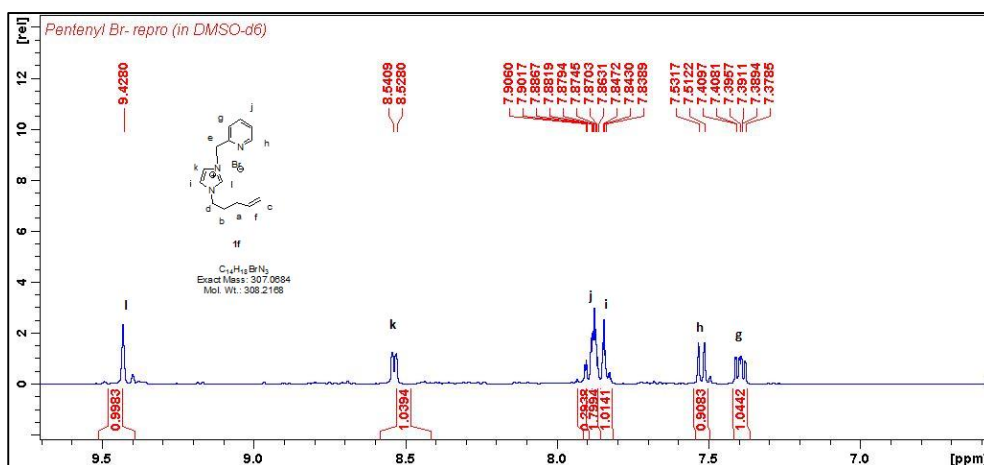

Figure S20: Expanded  $^1\text{H}$  NMR spectrum of 1f showing the aromatic region.

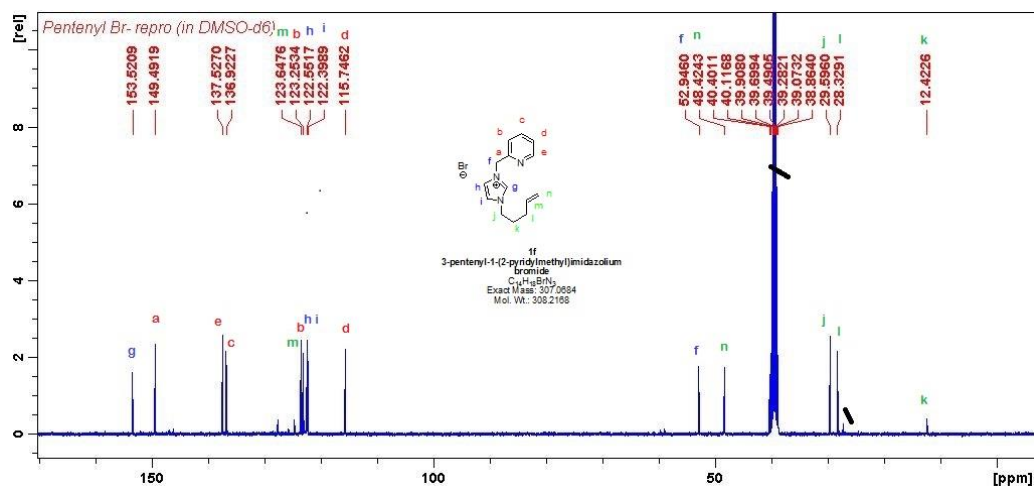

Figure S21:  $^{13}\text{C}$  NMR spectrum of 1f.

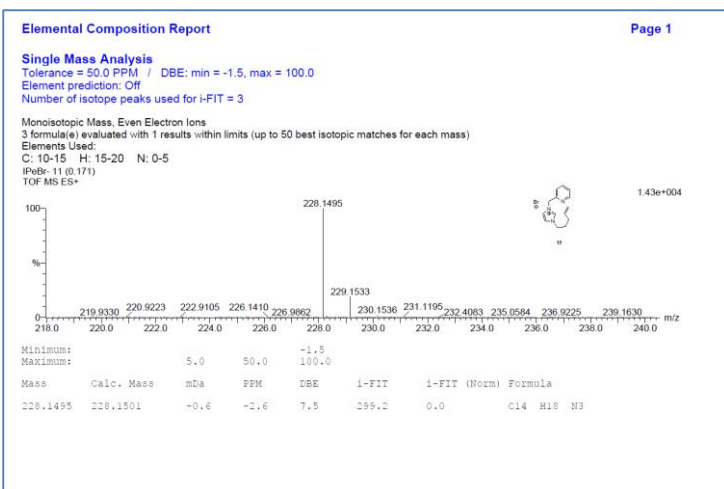

**Figure S22: HRMS spectrum of 1f.**

Data for picolyl functionalised imidazol-2-ylidene(NHC)-Ag(I) complexes (2)

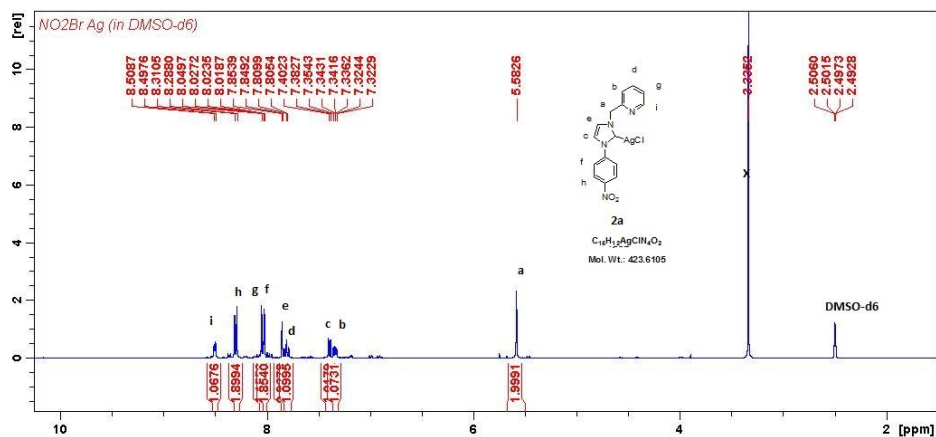

Figure S23: <sup>1</sup>H NMR spectrum for [1-(4-nitrophenyl)-3-(2-pyridyl)imidazol-2-ylidene]silver chloride (2a).

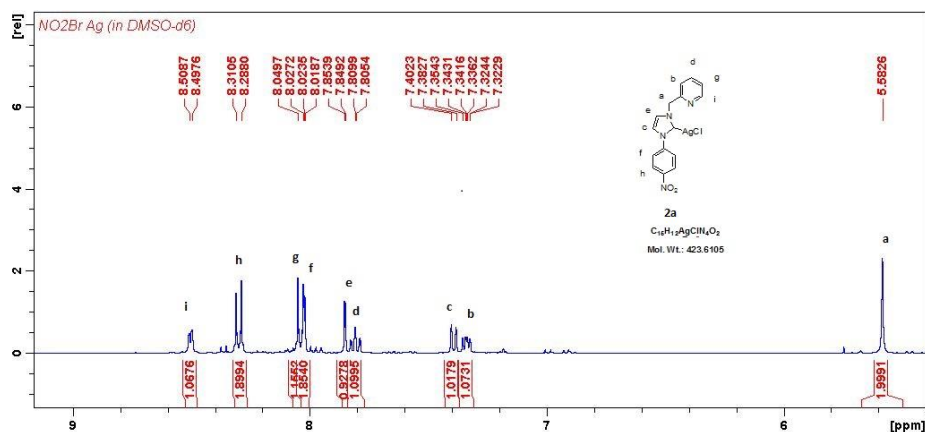

Figure S24: Expanded <sup>1</sup>H NMR spectrum of 2a.

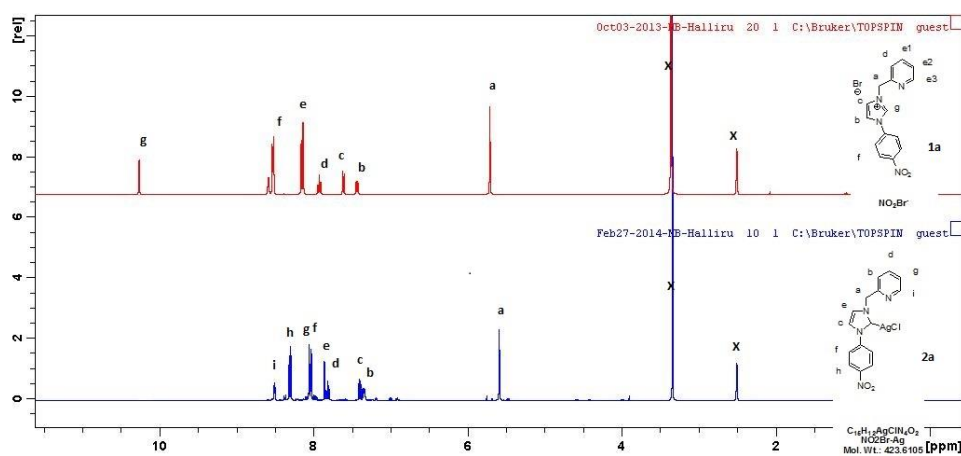

Figure S25: Comparative <sup>1</sup>H NMR spectra of 1a (top) and 2a (bottom).

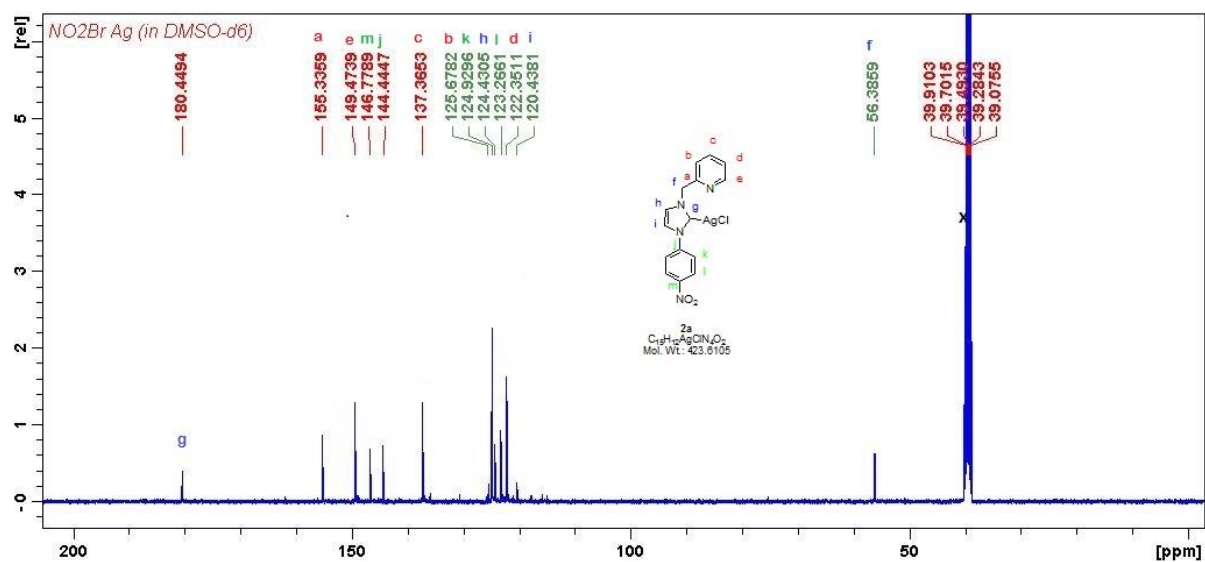

Figure S26: <sup>13</sup>C NMR spectrum of 2a.

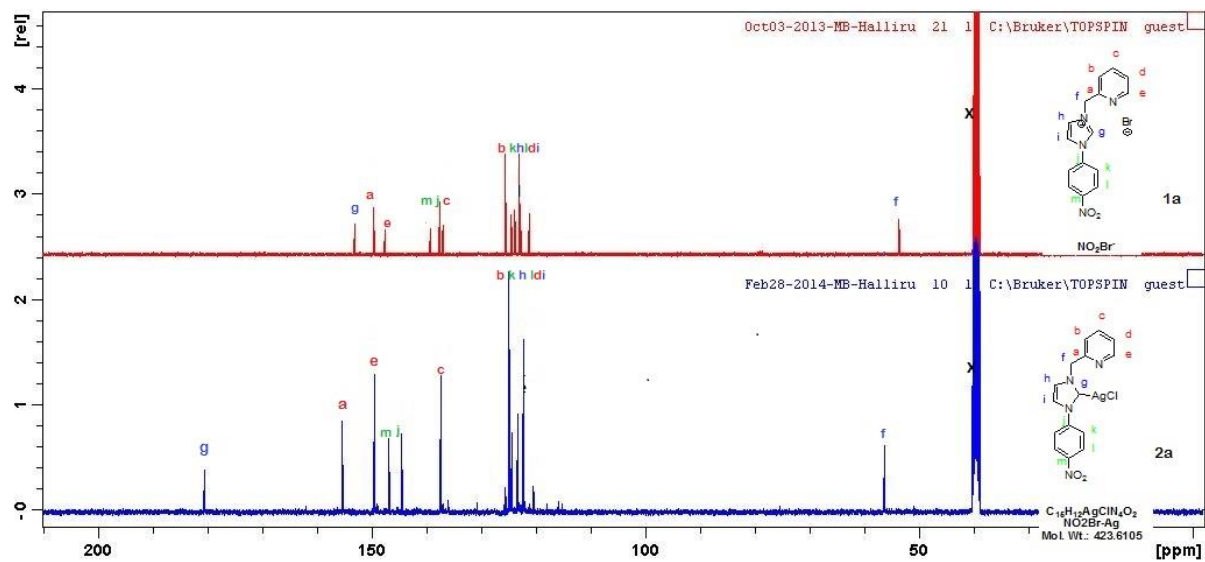

Figure S27: Comparative <sup>13</sup>C NMR spectra of 1a and 2a.

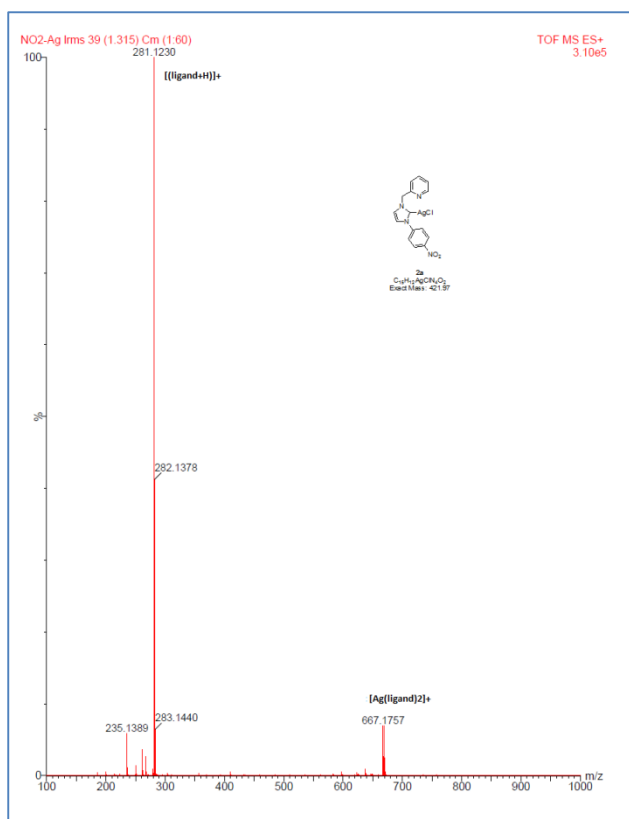

**Figure S28: TOF MS-ES<sup>+</sup> spectrum of 2a.**

Data for picolyl functionalised imidazol-2-ylidene(NHC)-Ni(II) and Co(II) complexes (3)

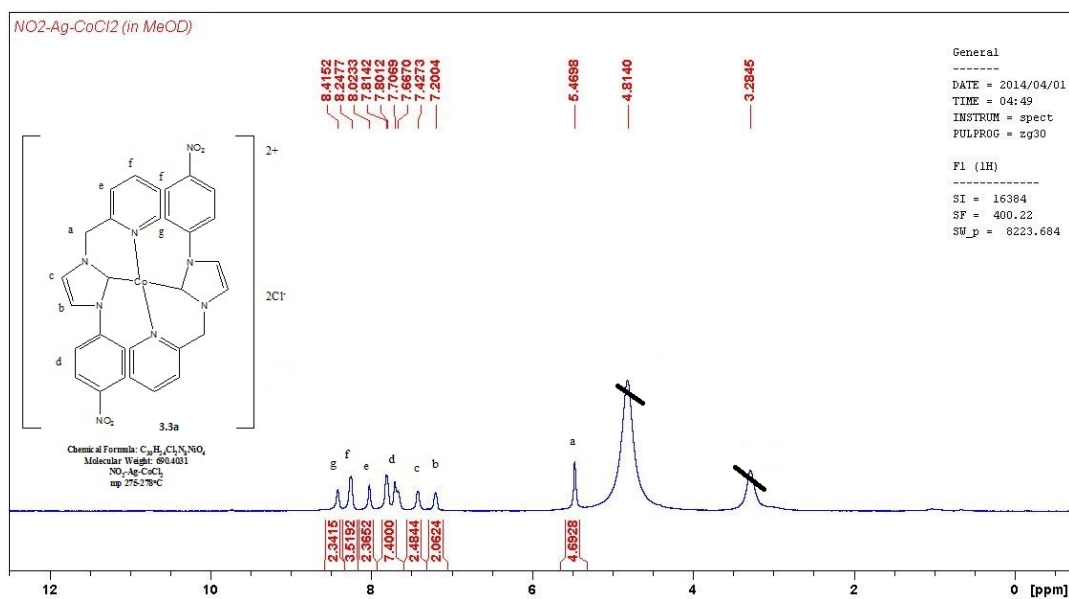

Figure S29: <sup>1</sup>H NMR spectrum of Co[3-(4-nitrophenyl)-1-picolyimidazolin-2-ylidene]<sub>2</sub>Cl<sub>2</sub> (3a).

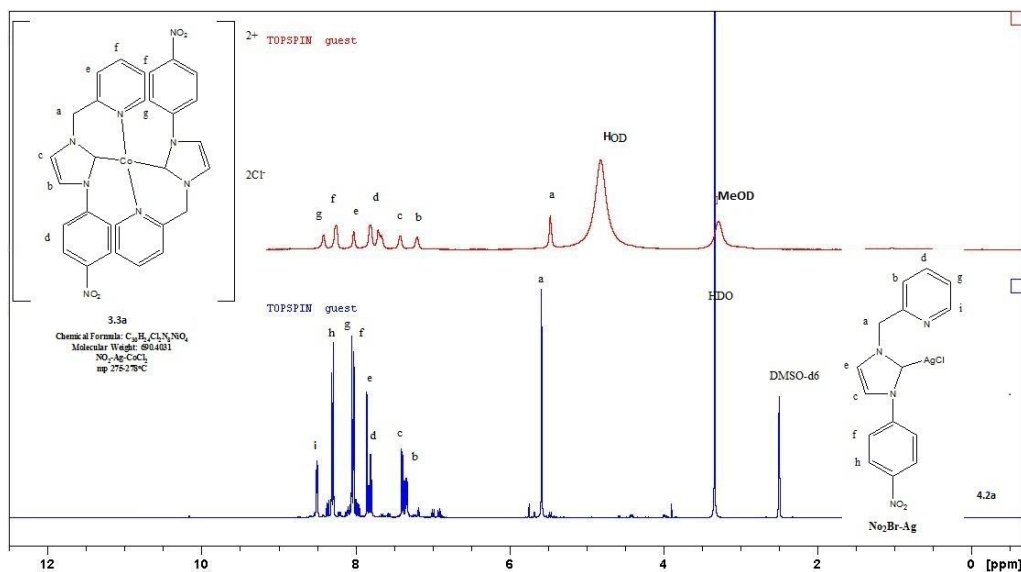

Figure S30: Comparative <sup>1</sup>H NMR spectra of 3a (top) and 2a (bottom).



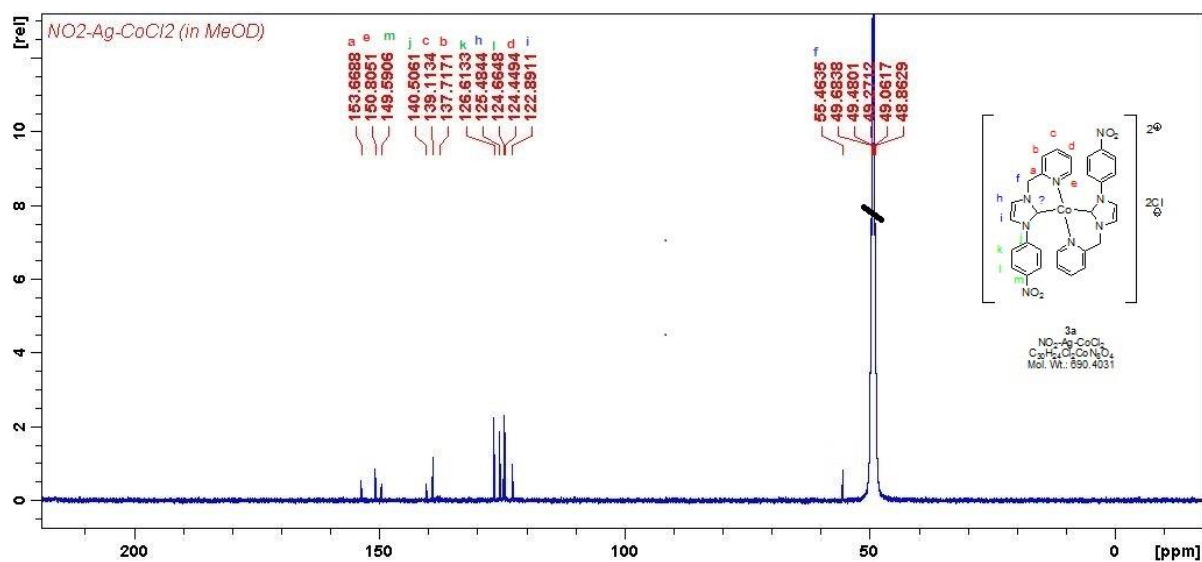

Figure S31: <sup>13</sup>C NMR spectrum of 3a.

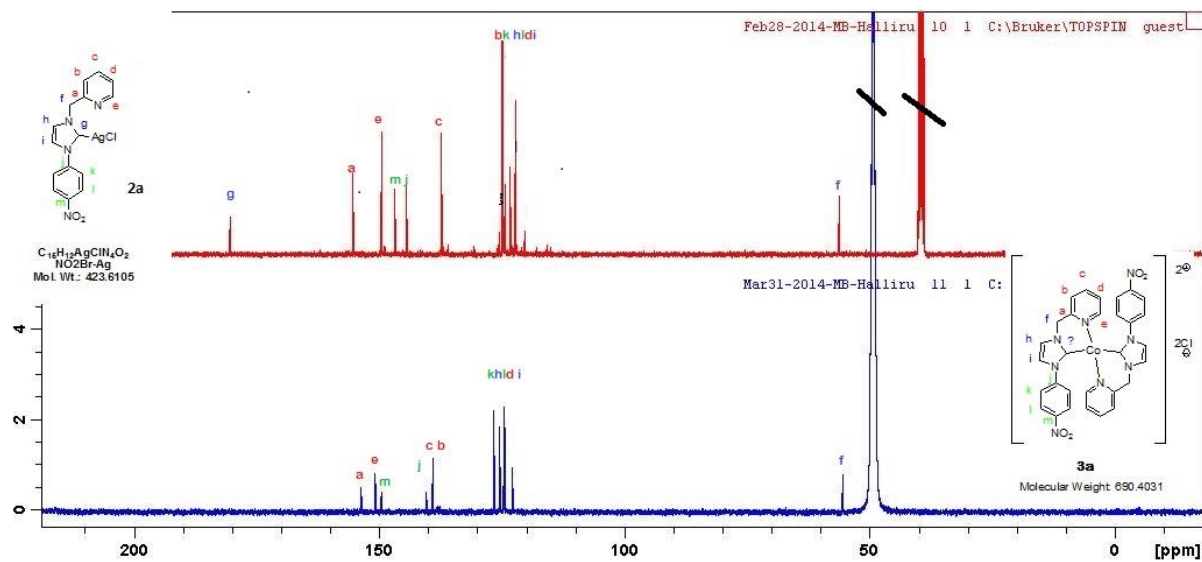

Figure S32: comparative <sup>13</sup>C NMR spectra of 2a (top) and 3a (bottom).

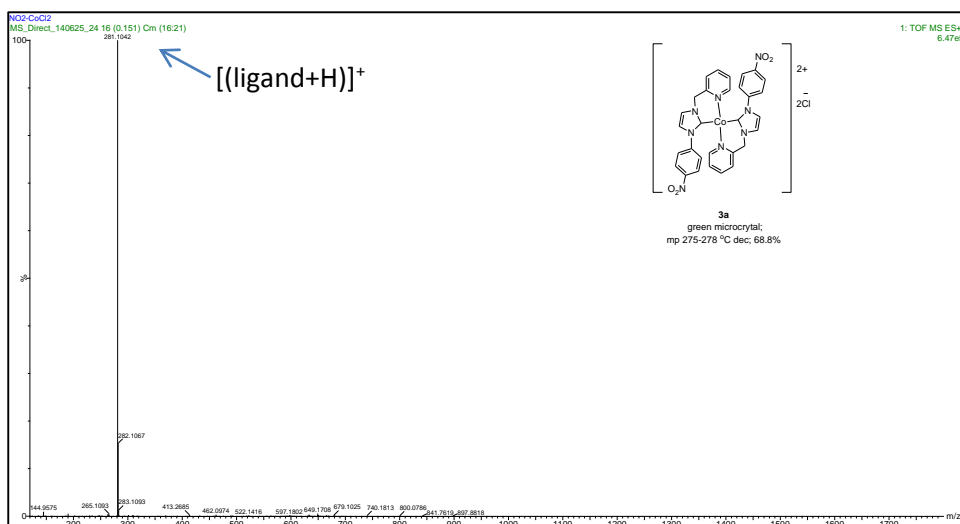

Figure S33: MS-ES<sup>+</sup> spectrum (1) of 3a.

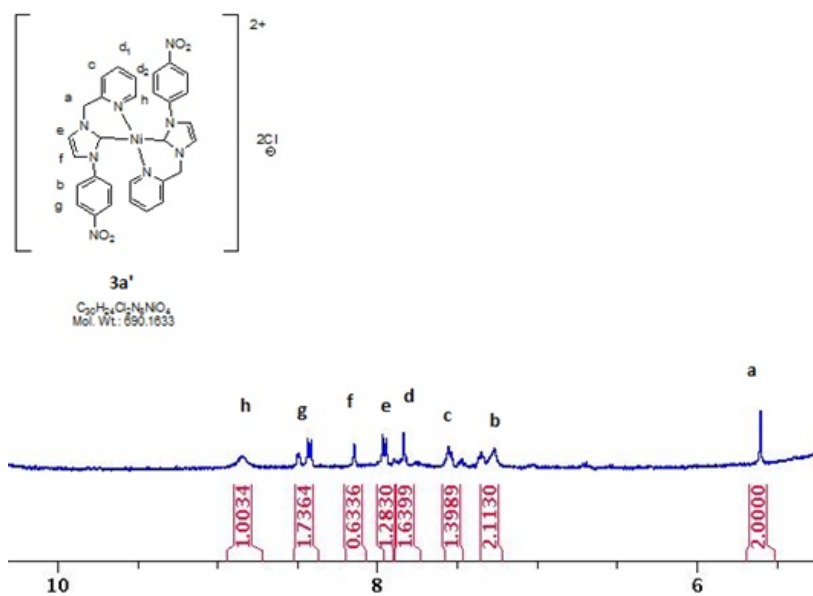

Figure S34: <sup>1</sup>H NMR spectrum of Ni[3-(4-nitrophenyl)-1-picolyimidazolin-2-ylidene]<sub>2</sub>Cl<sub>2</sub> (3a').

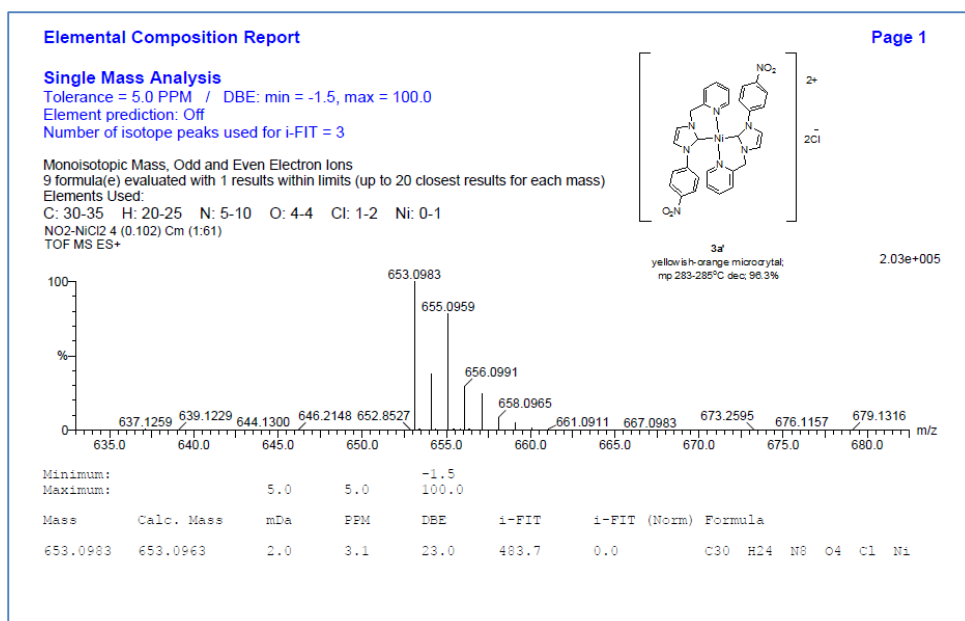

**Figure S35: HRMS spectrum of 3a'.**

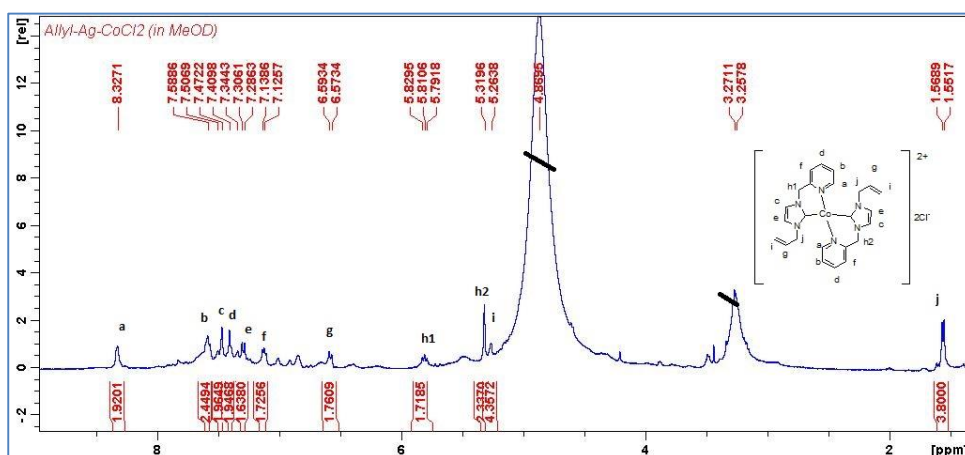

**Figure S36: <sup>1</sup>H NMR spectrum of Co(3-allyl-1-picolyimidazolin-2-ylidene)<sub>2</sub>Cl<sub>2</sub> (3d).**

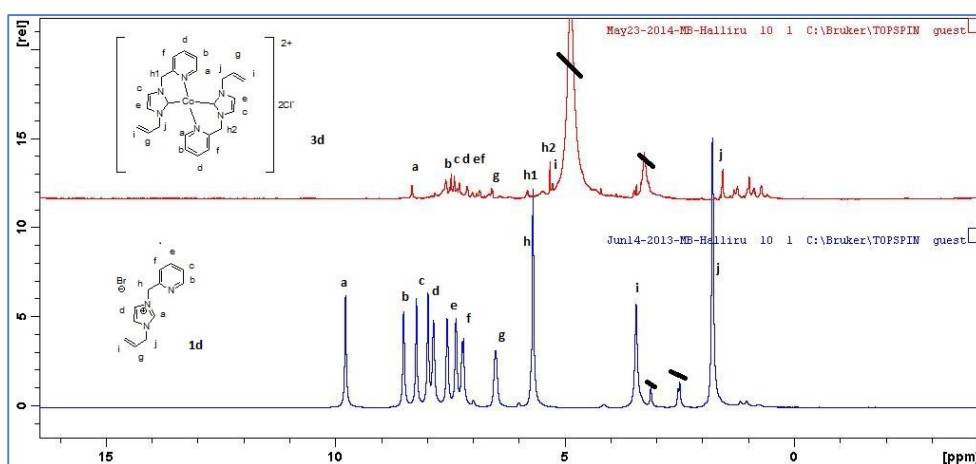

Figure S37: Comparative  $^1\text{H}$  NMR spectra of 3d (top) and 1d (bottom).

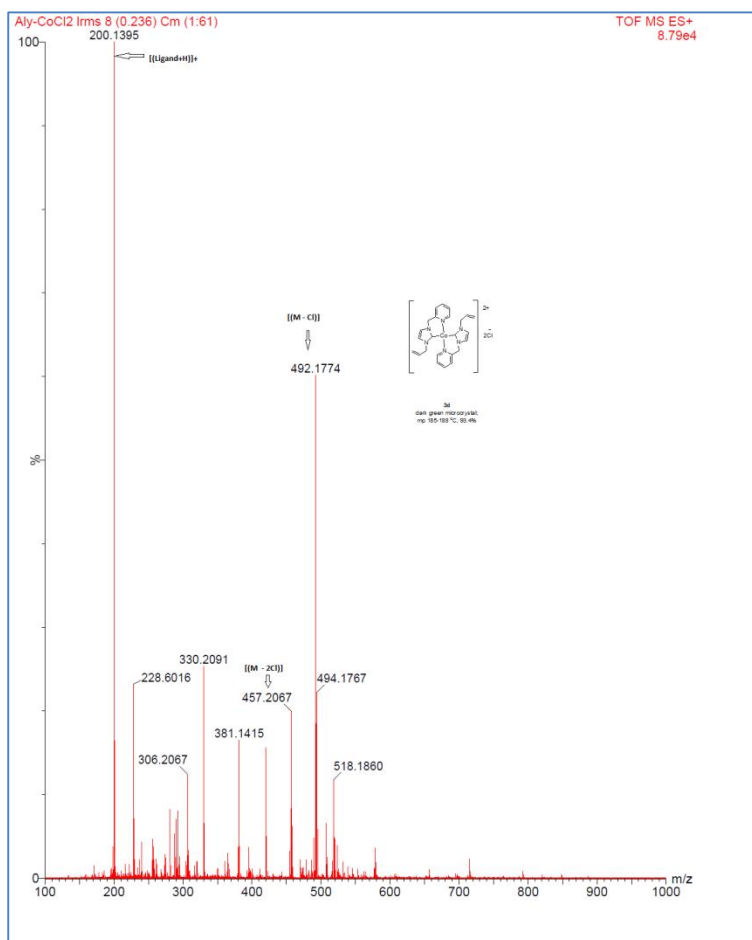

Figure S38: TOF MS-ES $^+$  spectrum of 3d.

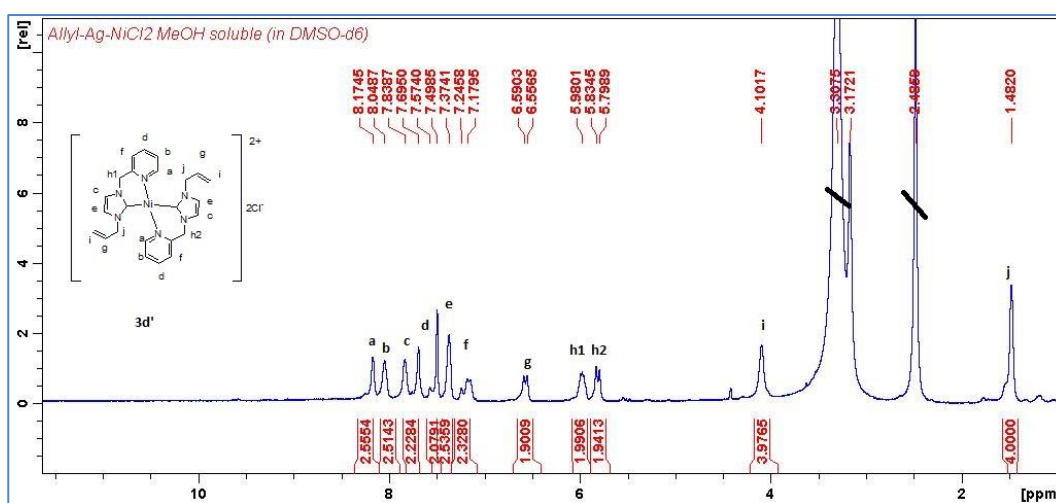

Figure S39:  $^1\text{H}$  NMR spectrum of  $\text{Ni}(3\text{-allyl-1-picolylimidazolin-2-ylidene})_2\text{Cl}_2$  (3d').

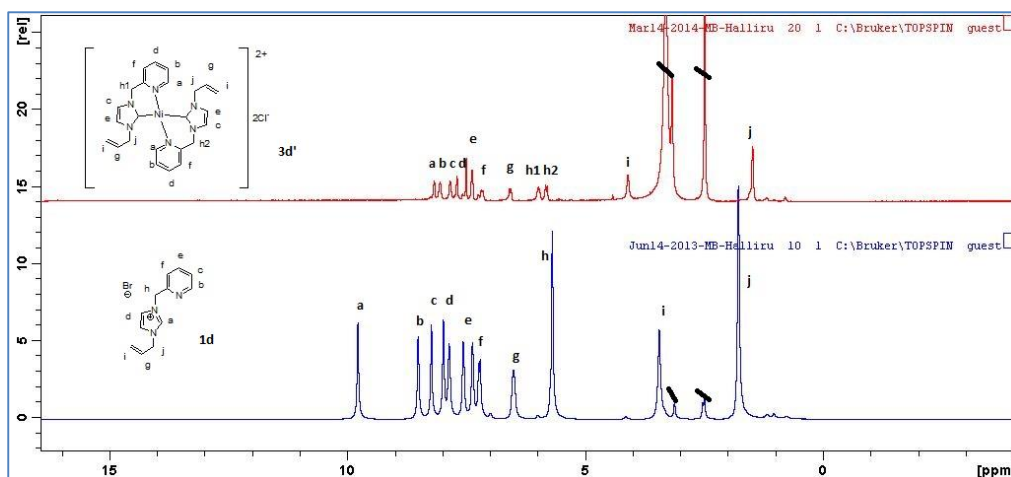

Figure S40: Comparative <sup>1</sup>H NMR spectra of 3d' (top) and 1d (bottom).

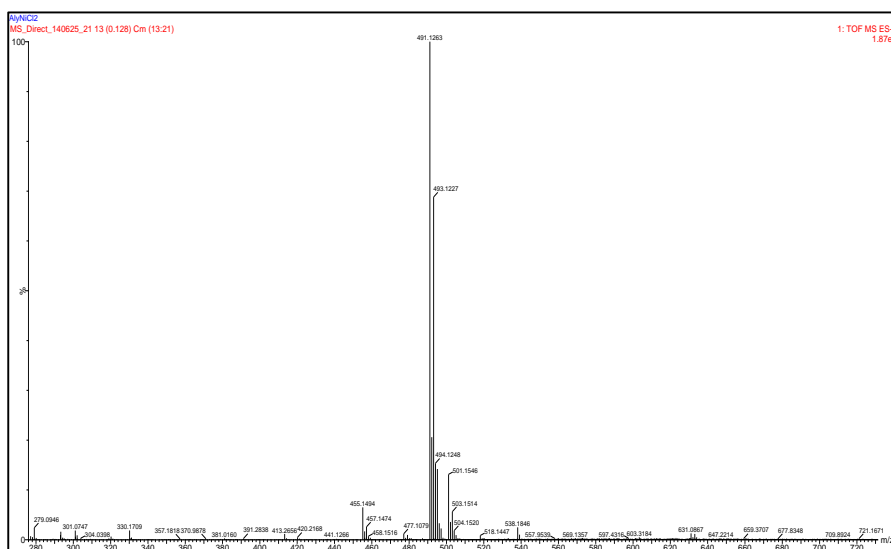

Figure S41: TOF MS-ES+ spectrum of 3d'.

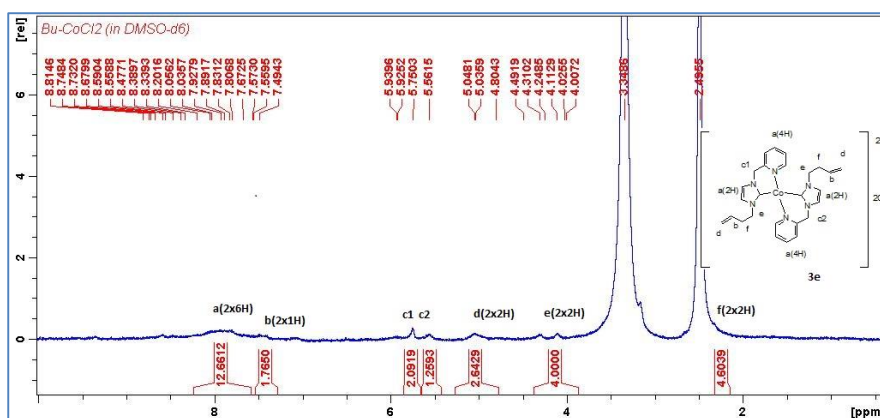

Figure S42: <sup>1</sup>H NMR spectrum of Co(3-butenyl-1-picolylimidazolin-2-ylidene)<sub>2</sub>Cl<sub>2</sub> (3e).

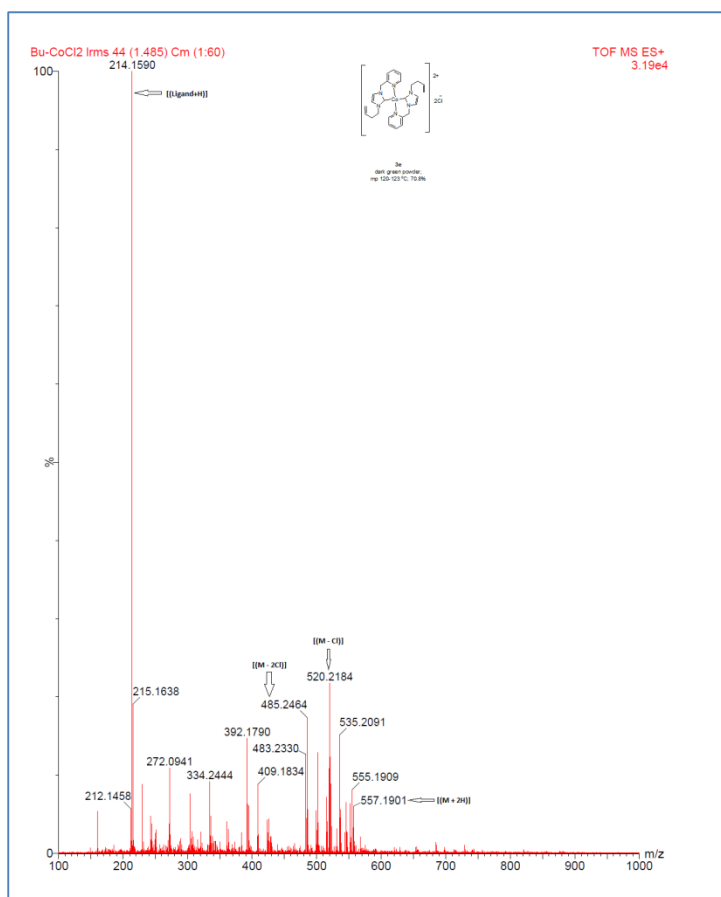

Figure S43: TOF MS-ES<sup>+</sup> spectrum of 3e.

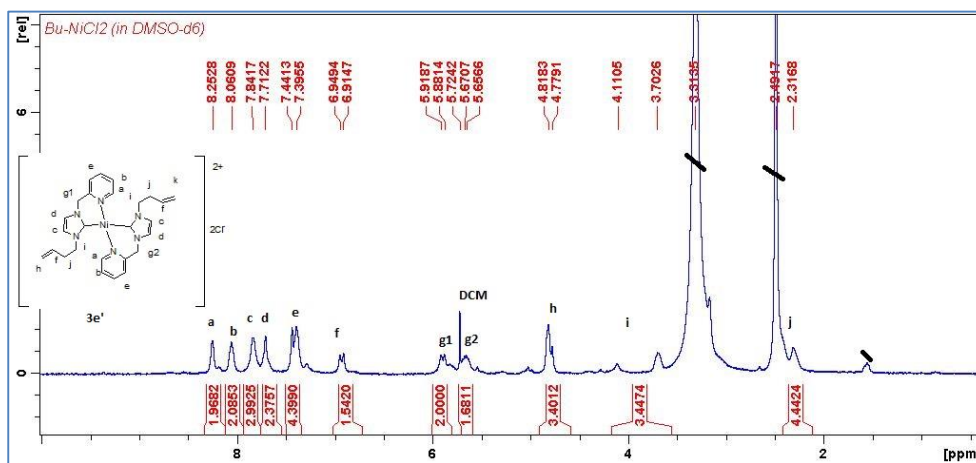

Figure S44: <sup>1</sup>H NMR spectrum of Ni(3-butenyl-1-picolylimidazolin-2-ylidene)<sub>2</sub>Cl<sub>2</sub> (3e').

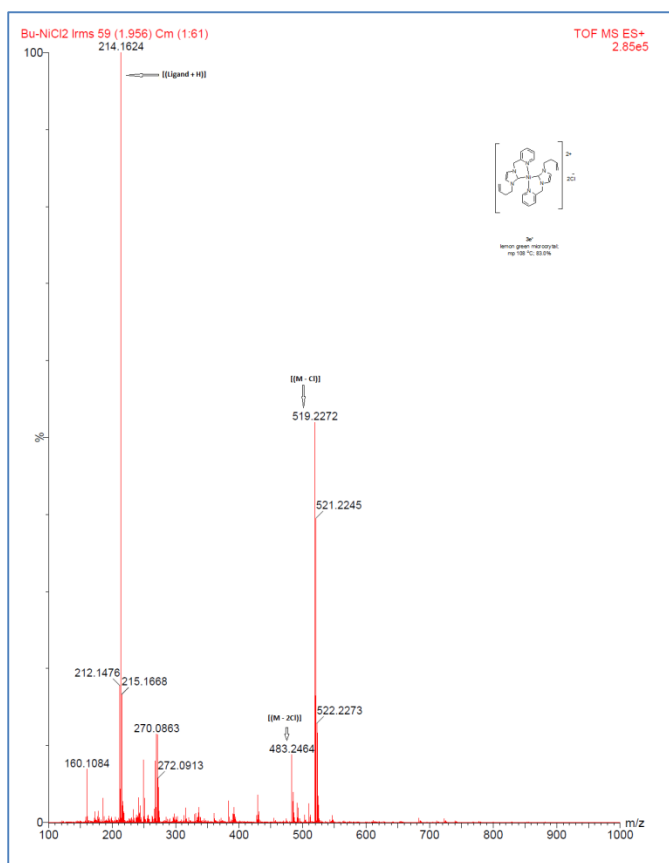

**Figure S45: TOF MS-ES<sup>+</sup> spectrum of 3e'.**

## Analysis data for substrates and isolated products

### Diphenyl amine:

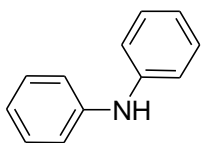

$^1\text{H}$  NMR (400 MHz, DMSO- $d_6$ ):  $\delta$  8.12 (bs, 1H, NH), 7.21 (d,  $J=7.4$  Hz, 2x2H), 7.06 (d,  $J=7.6$  Hz, 2x2H), 6.81 (t,  $J=7.3$  Hz, 2x1H).  $^{13}\text{C}$  NMR (400 MHz, DMSO- $d_6$ ):  $\delta$  143.4, 129.1, 119.6, 116.7. FTIR (neat)  $\text{cm}^{-1}$ :  $\nu_{\text{N-H}}$  3380 (bs, 2° amine),  $\nu_{\text{C-H}}$  3041,  $\nu_{\text{C-N}}$  1307,  $\nu_{\text{Ar}}$  741.

### 4-methoxy-*N*-phenylbenzenamine:

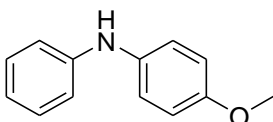

$^1\text{H}$  NMR (400 MHz,  $\text{CDCl}_3$ ):  $\delta$  7.87 (d,  $J=8.8$  Hz, 2H), 7.21 (t,  $J=15.8$  Hz, 1H), 7.07 (d,  $J=8.8$  Hz, 2H), 6.99 (d,  $J=8.9$  Hz, 2H), 6.90 (dd,  $J=7.8$  Hz, 2H), 3.89 (bs, 1H, N-H), 3.87 (s, 3H, O- $\text{CH}_3$ ).  $^{13}\text{C}$  NMR (400 MHz,  $\text{CDCl}_3$ ):  $\delta$  161.6, 147.1, 129.3, 124.3, 122.2, 119.6, 115.6, 114.2, 55.6. FTIR (neat)  $\text{cm}^{-1}$ :  $\nu_{\text{N-H}}$  3343 (bs, 2° amine),  $\nu_{\text{CH}}$  2935,  $\nu_{\text{C-O}}$  1146,  $\nu_{\text{C-N}}$  1220,  $\nu_{\text{Ar}}$  827.

### 2-methoxy-*N*-phenylbenzenamine:

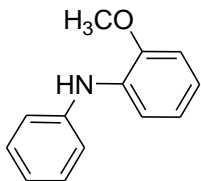

$^1\text{H}$  NMR (400 MHz, DMSO- $d_6$ ):  $\delta$  8.14 (bs, 1H, N-H), 7.23 (t,  $J=15.6$  Hz, 2x1H), 7.10 (m, 3x1H), 6.82 (t,  $J=7.3$  Hz, 1H), 6.65 (d,  $J=4.6$  Hz, 1H), 6.59 (d,  $J=1.8$  Hz, 1H), 6.39 (d,  $J=4.9$  Hz, 1H), 3.70 (s, 3H, O- $\text{CH}_3$ ).  $^{13}\text{C}$  NMR (400 MHz, DMSO- $d_6$ ):  $\delta$  160.2, 144.8, 143.1, 129.9, 129.1, 119.8, 117.1, 108.9, 104.9, 102.1, 54.8. FTIR (neat)  $\text{cm}^{-1}$ :  $\nu_{\text{N-H}}$  3386 (bs, 2° amine),  $\nu_{\text{CH}}$  2916,  $\nu_{\text{C=C}}$  1591,  $\nu_{\text{C-N}}$  1259,  $\nu_{\text{C-O}}$  1156,  $\nu_{\text{Ar}}$  688.



#### 4-methoxy-*N*-(3,5-dimethylphenyl)benzenamine:

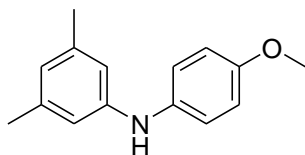

$^1\text{H}$  NMR (400 MHz, DMSO- $d_6$ ):  $\delta$  7.82 (d,  $J=8.9$  Hz, 2x1H), 7.11 (d,  $J=8.9$  Hz, 2x1H), 6.62 (d,  $J=8.9$  Hz, 1H), 6.54 (s, 2x1H), 3.85 (s, 2x3H), 3.85 (s, 3H, O-CH $_3$ ), 3.72 (bs, 1H, N-H).  $^{13}\text{C}$  NMR (400 MHz, DMSO- $d_6$ ):  $\delta$  161.4, 146.2, 132.7, 124.1, 123.7, 114.5, 107.5, 101.4, 55.7, 55.6. FTIR<sub>(neat)</sub>  $\text{cm}^{-1}$ :  $\nu_{\text{N-H}}$  3320 (bs, 2° amine),  $\nu_{\text{C-H}}$  2925,  $\nu_{\text{C=C}}$  1591,  $\nu_{\text{C-N}}$  1494,  $\nu_{\text{C-O}}$  1156,  $\nu_{\text{Ar}}$  755.

#### 4-(phenylamino)benzonitrile:

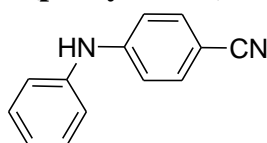

$^1\text{H}$  NMR (400 MHz, DMSO- $d_6$ ):  $\delta$  7.89 (d,  $J=7.8$  Hz, 4H), 7.61 (m, 4H), 7.29 (t,  $J=7.7$  Hz, 1H), 6.84 (bs, 1H, N-H).  $^{13}\text{C}$  NMR (400 MHz, DMSO- $d_6$ ):  $\delta$  153.6, 151.9, 131.5, 129.5, 128.8, 127.1, 122.5, 119.8. FTIR<sub>(neat)</sub>  $\text{cm}^{-1}$ :  $\nu_{\text{N-H}}$  3389 (bs, 2° amine),  $\nu_{\text{CN}}$  2260,  $\nu_{\text{C=C}}$  1516,  $\nu_{\text{C-N}}$  1310,  $\nu_{\text{Ar}}$  743.

#### 3,5-dimethyl-*N*-phenylbenzenamine:

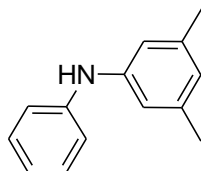

$^1\text{H}$  NMR (400 MHz, DMSO- $d_6$ ):  $\delta$  7.90–7.88 (m, 4x1H), 7.59 (d,  $J=7.6$  Hz, 2x1H), 7.17 (s, 1H), 7.15 (s, 1H), 6.98 (bs, 1H, N-H), 2.24 (s, 2x3H, CH $_3$ ).  $^{13}\text{C}$  NMR (400 MHz, DMSO- $d_6$ ):  $\delta$  151.9, 139.9, 131.5, 129.4, 128.8, 128.6, 122.5, 119.8, 20.5. FTIR<sub>(neat)</sub>  $\text{cm}^{-1}$ :  $\nu_{\text{N-H}}$  3395 (bs, 2° amine),  $\nu_{\text{C-H}}$  2921,  $\nu_{\text{Ar}}$  744, 690.

#### 2-methyl-*N*-phenylbenzenamine:

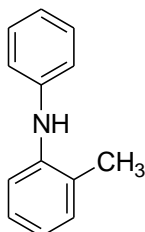

$^1\text{H}$  NMR (400 MHz, DMSO- $d_6$ ):  $\delta$  7.28-7.26 (m, 2x1H), 7.14 (t,  $J=8.0$  Hz, 1H), 7.07-7.05 (m, 2x1H), 6.93-6.87 (m, 3x1H), 6.75 (d,  $J=7.4$  Hz, 1H), 5.65 (bs, 1H, NH), 2.31 (s, 1H, CH $_3$ ).  $^{13}\text{C}$  NMR (400

MHz, CDCl<sub>3</sub>):  $\delta$  154.9, 143.1, 139.2, 129.3, 129.2, 121.9, 120.9, 118.5, 117.8, 114.9, 21.5. FTIR  
(neat) cm<sup>-1</sup>:  $\nu_{\text{N-H}}$  3390 (bs, 2° amine),  $\nu_{\text{C-H}}$  3037, 2922,  $\nu_{\text{C=C}}$  1589,  $\nu_{\text{Ar}}$  744.

**Biphenyl:**

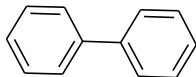

<sup>1</sup>H NMR (400 MHz, DMSO-d<sub>6</sub>):  $\delta$  8.33 (dd, 2x2H), 8.05 (m, 2x3H). FTIR (neat) cm<sup>-1</sup>:  $\nu_{\text{C-H}}$  3062,  $\nu_{\text{Ar}}$  772.

## NMR Spectra for aryl amine substrates and isolated arylated products

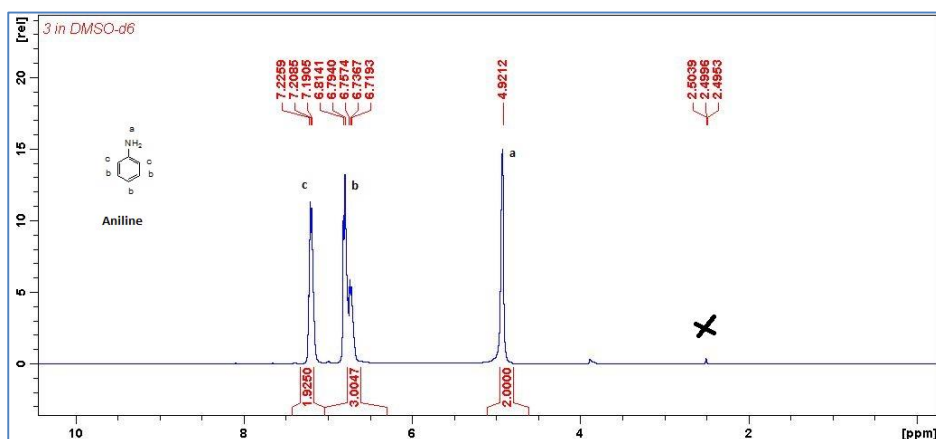

Figure S46:  $^1\text{H}$  NMR spectrum of aniline.

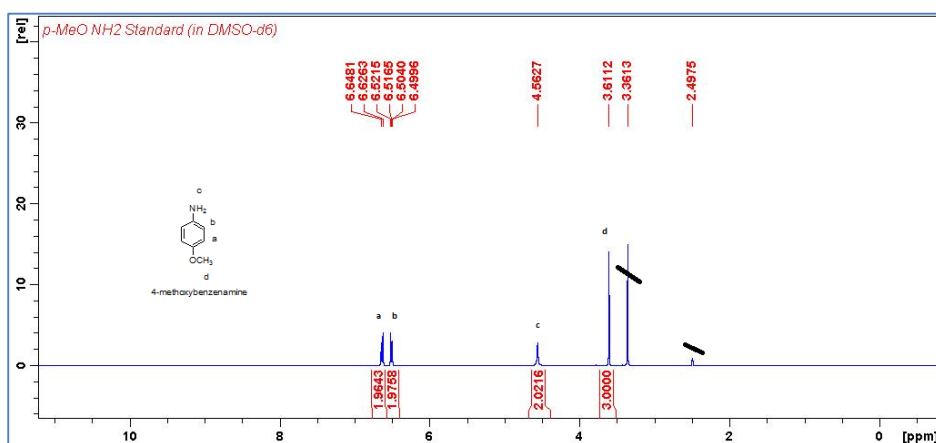

Figure S47:  $^1\text{H}$  NMR spectrum of 4-methoxybenzylamine.

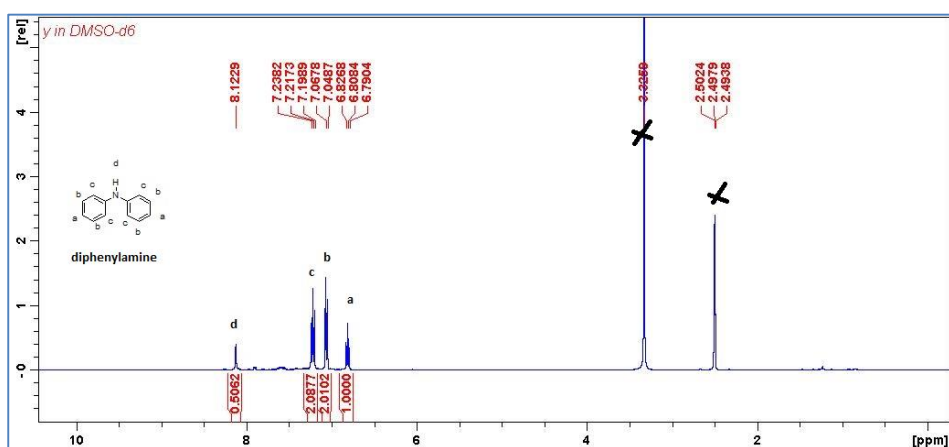

Figure S48:  $^1\text{H}$  NMR spectrum for diphenylamine.

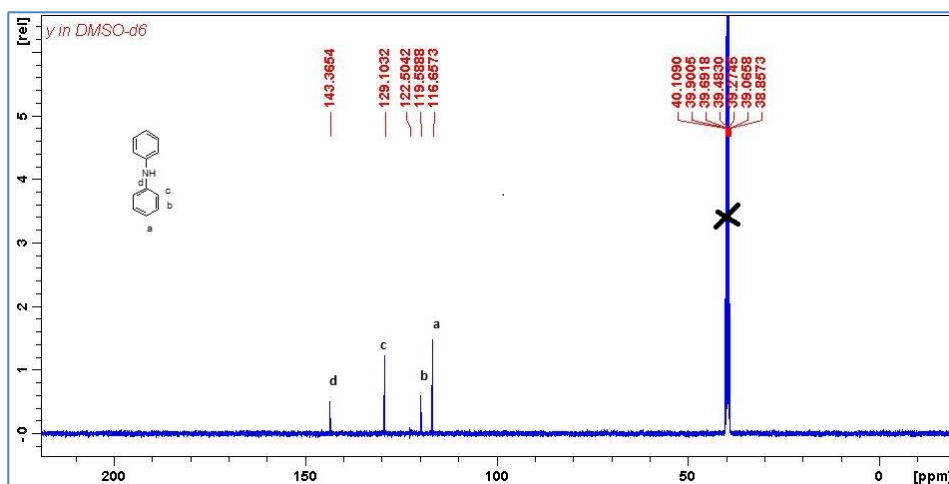

Figure S49:  $^{13}\text{C}$  NMR for diphenylamine.

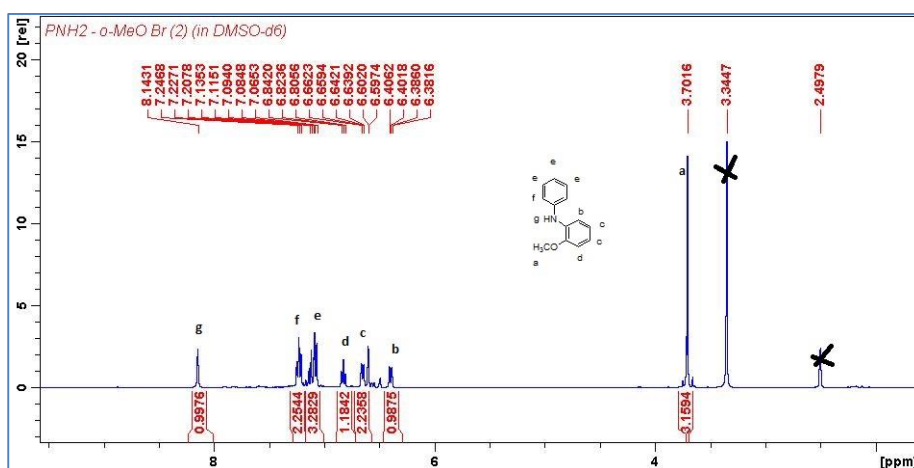

Figure S50:  $^1\text{H}$  NMR spectrum for 2-methoxy-N-phenylbenzenamine.

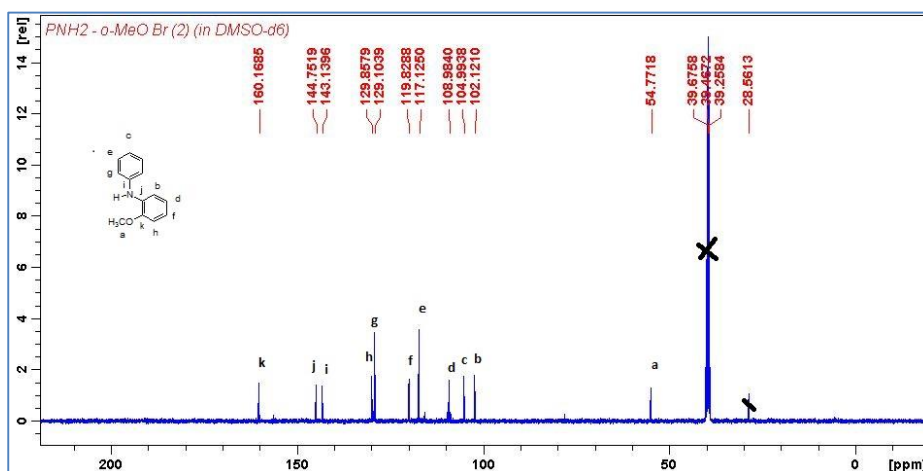

Figure S51:  $^{13}\text{C}$  NMR spectrum for 2-methoxy-N-phenylbenzenamine.

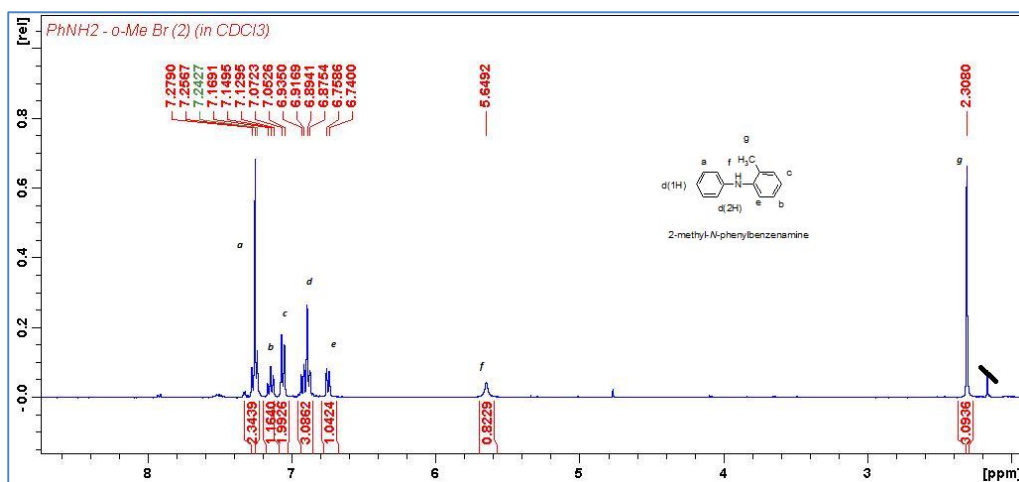

Figure S52: <sup>1</sup>H NMR spectrum for 2-methyl-N-phenylbenzenamine.

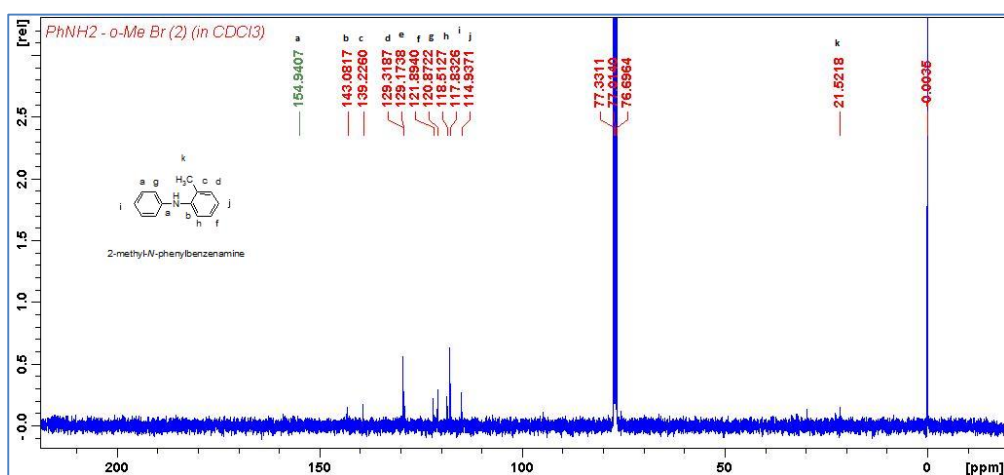

Figure S53: <sup>13</sup>C NMR spectrum for 2-methyl-N-phenylbenzenamine.

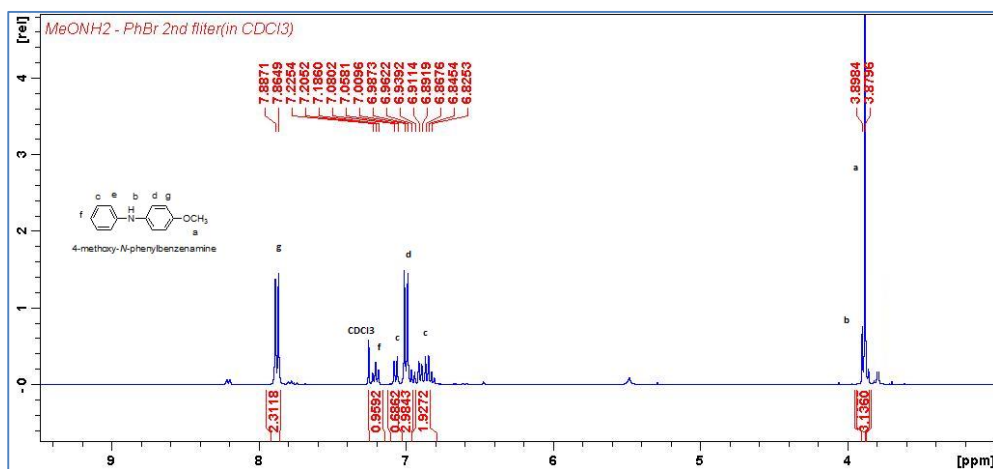

Figure S54: <sup>1</sup>H NMR spectrum for 4-methoxy-N-phenylbenzenamine.

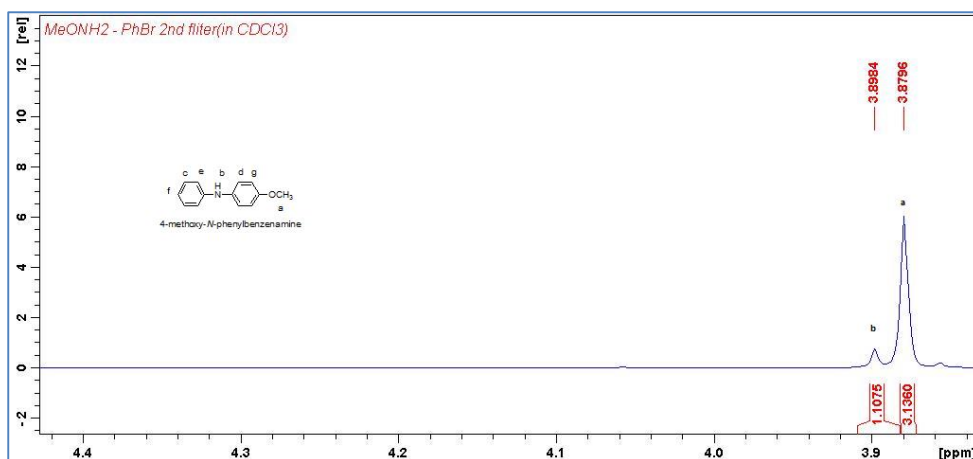

Figure S55:  $^1\text{H}$  NMR (expanded) spectrum for 4-methoxy-N-phenylbenzenamine.

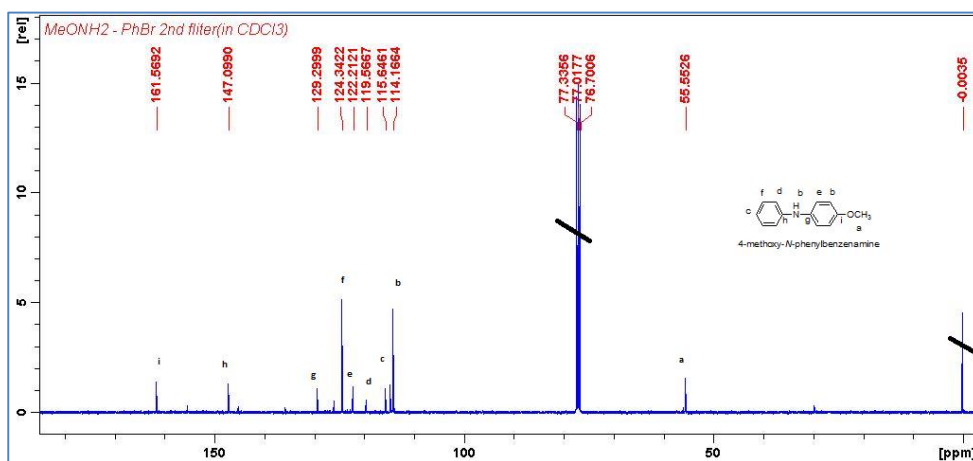

Figure S56:  $^{13}\text{C}$  NMR spectrum for 4-methoxy-N-phenylbenzenamine.

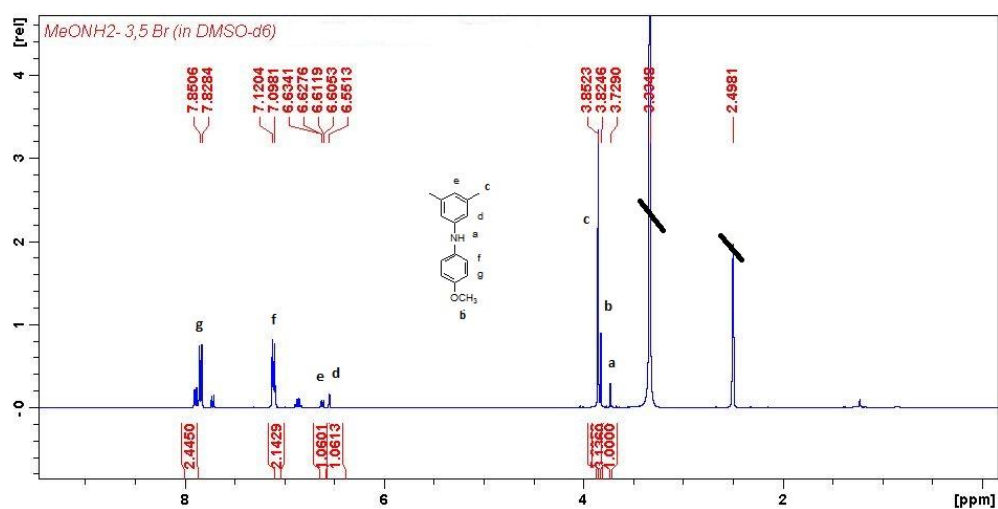

Figure S57:  $^1\text{H}$  NMR spectrum for 4-methoxy-N-(3,5-dimethylphenyl)benzenamine.

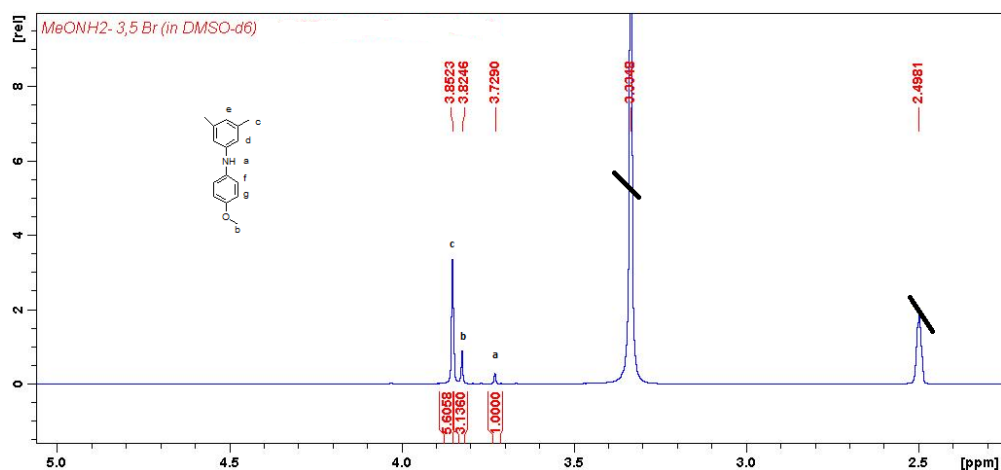

Figure S58: Expanded  $^1\text{H}$  NMR spectrum for 4-methoxy-N-(3,5-dimethylphenyl)benzenamine.

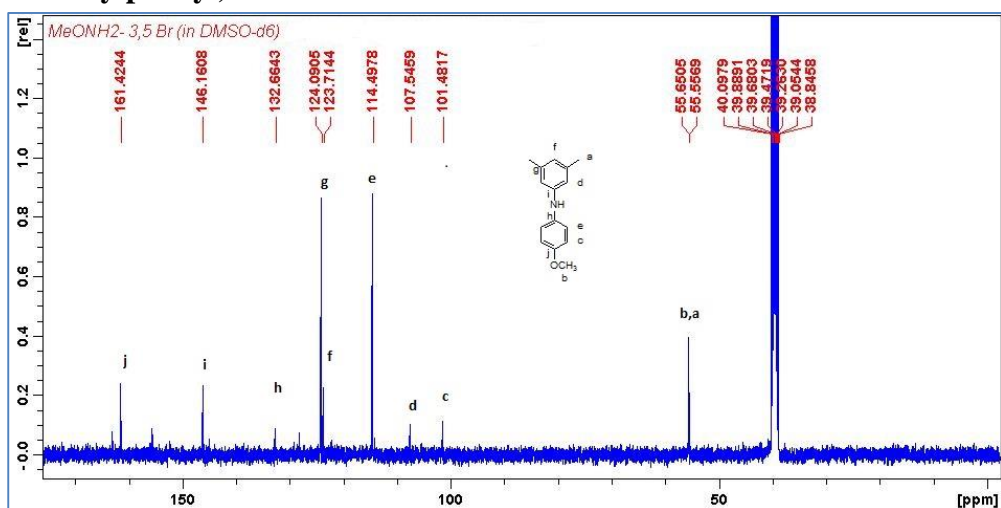

Figure S59:  $^{13}\text{C}$  NMR spectrum for 4-methoxy-N-(3,5-dimethylphenyl)benzenamine.

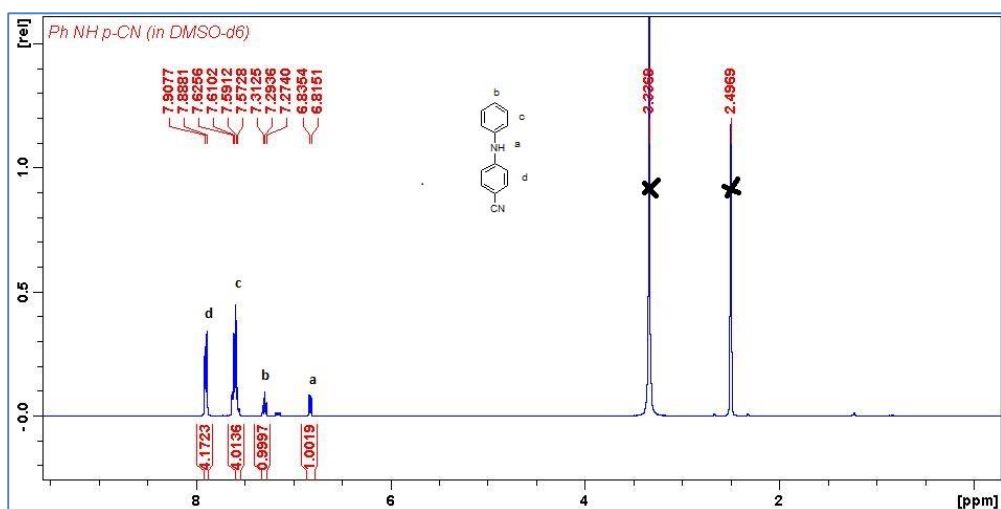

Figure S60:  $^1\text{H}$  NMR spectrum for 4-(phenylamino)benzonitrile.

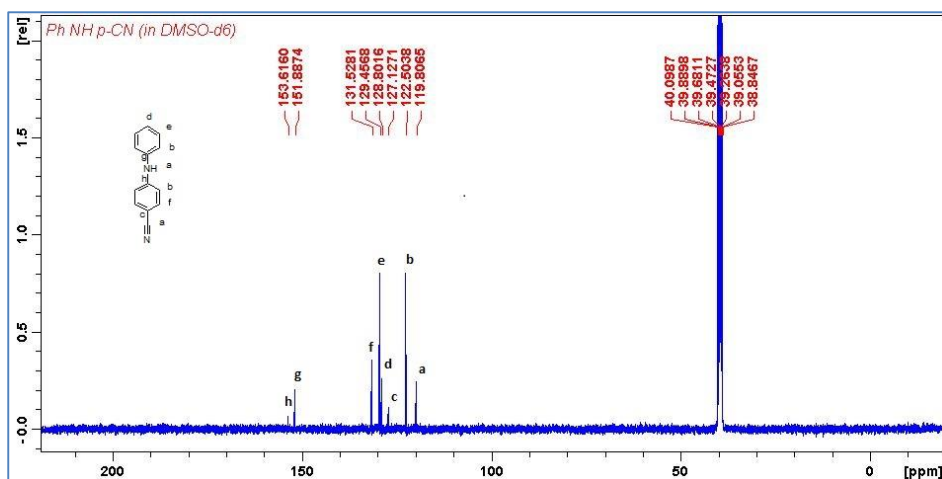

Figure S61:  $^{13}\text{C}$  NMR spectrum for 4-(phenylamino)benzonitrile.

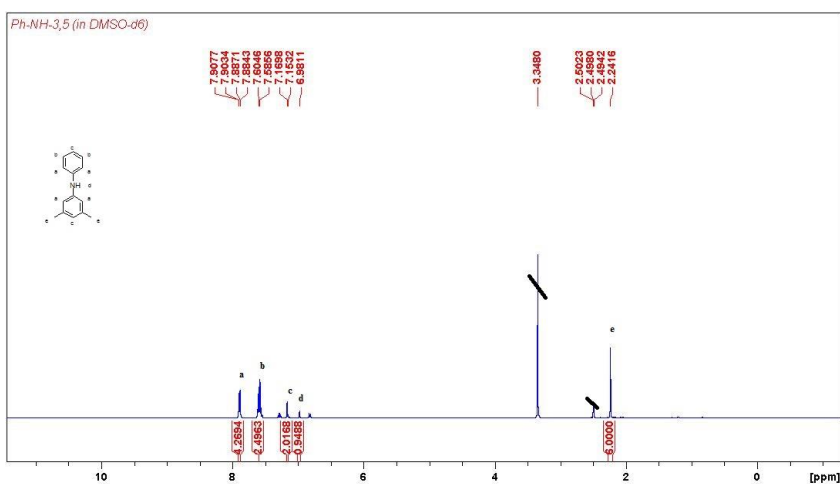

Figure S62:  $^1\text{H}$  NMR spectrum for 3,5-dimethyl-N-phenylbenzenamine.

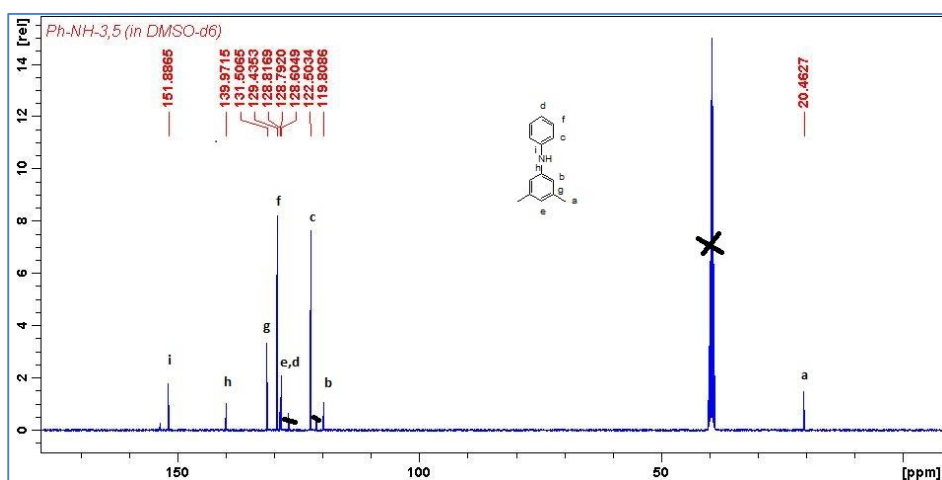

Figure S63:  $^{13}\text{C}$  NMR spectrum for 3,5-dimethyl-N-phenylbenzenamine.



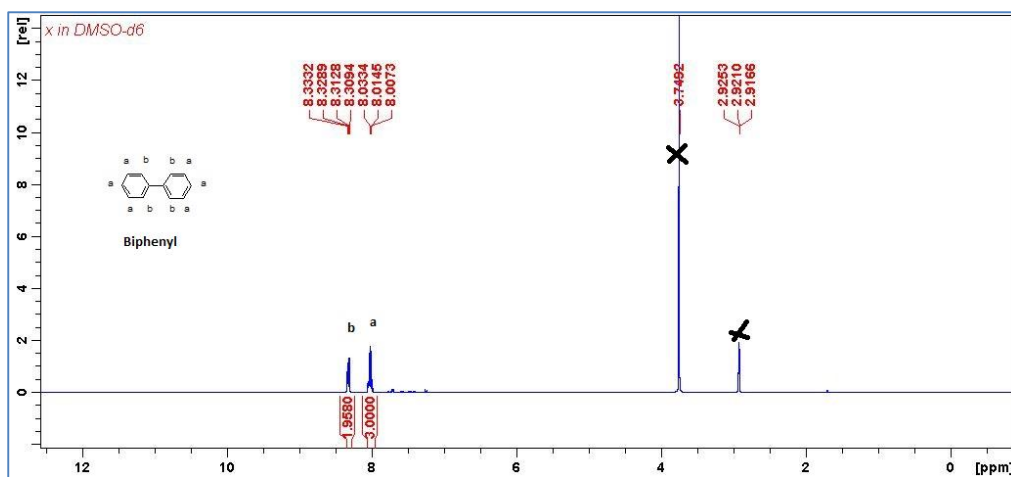

Figure S64:  $^1\text{H}$  NMR spectrum for biphenyl.

## Supplementary material-2

### Magnetic susceptibility measurements for the paramagnetic compounds 3d and 3e

#### Hysteresis loop measurement experiment results for Co(3-allyl-1-picolyimidazolin-2-ylidene)<sub>2</sub>Cl<sub>2</sub> (3d)

Start Time: 9/3/2014 4:09:42 PM      Time Completed: 9/3/2014  
5:10:24 PM      Elapsed Time: 01:00:41  
Sample ID: Aly-CoCl<sub>2</sub>

Experiment: C:\IDEASVSM\Default  
UserID\Experiments\Hafiz\Hafiz.exp  
Data File: C:\IDEASVSM\Default UserID\IbrahimH\Aly-CoCl<sub>2</sub>.txt  
Plot File: C:\IDEASVSM\Default UserID\IbrahimH\Aly-CoCl<sub>2</sub>.oc2  
VSM Exp File: C:\IDEASVSM\Default  
UserID\Experiments\Hafiz\Hafiz.stp  
VSM Data File: C:\IDEASVSM\Default UserID\IbrahimH\Aly-CoCl<sub>2</sub>.dat

\*\*\*DATA\*\*\*

Coercivity (H<sub>ci</sub>) 79.265 G

Mr, Negative -0.23028 emu/g

Mr, Positive -0.18188 emu/g

Ms, Negative -1.1903 emu/g

Ms, Positive 0.83096 emu/g

Squareness 2.39E-02

| Field(G) | Moment/Mass(emu/g) |
|----------|--------------------|
| 57.319   | -0.18554           |
| 258.55   | -0.14491           |
| 502.67   | -0.11007           |
| 753.52   | -0.07692           |
| 1004.9   | -0.05037           |
| 1255.2   | -0.0345            |
| 1505.3   | -0.02834           |
| 1755     | -0.0137            |
| 2004.7   | 0.002502           |
| 2254.1   | 0.009468           |
| 2503.1   | 0.037536           |
| 2752.3   | 0.10101            |
| 3001.1   | 0.21398            |

|        |         |
|--------|---------|
| 3249.9 | 0.23355 |
| 3498.5 | 0.19827 |
| 3747.1 | 0.19777 |
| 3995.2 | 0.20172 |
| 4243.6 | 0.21627 |
| 4491.8 | 0.23259 |
| 4739.7 | 0.23579 |
| 4987.7 | 0.26097 |
| 5235.7 | 0.27852 |
| 5483.9 | 0.29392 |
| 5732   | 0.3018  |
| 5980.1 | 0.34113 |
| 6227.8 | 0.34604 |
| 6475.5 | 0.36345 |
| 6723.2 | 0.36453 |
| 6970.9 | 0.37486 |
| 7218.6 | 0.38863 |
| 7466.3 | 0.41419 |
| 7713.9 | 0.41223 |
| 7961.3 | 0.43231 |
| 8208.8 | 0.43157 |
| 8456   | 0.46089 |
| 8703   | 0.46085 |
| 8950   | 0.47652 |
| 9197.2 | 0.51552 |
| 9443.9 | 0.50864 |
| 9690.7 | 0.5221  |
| 9937.2 | 0.53235 |
| 10184  | 0.53754 |
| 10430  | 0.55553 |
| 10675  | 0.57044 |
| 10921  | 0.59197 |
| 11167  | 0.62063 |
| 11412  | 0.68687 |
| 11657  | 0.70151 |
| 11901  | 0.73003 |
| 12145  | 0.7514  |
| 12388  | 0.78683 |
| 12630  | 0.80117 |
| 12872  | 0.83094 |
| 13113  | 0.77872 |
| 13354  | 0.73509 |
| 13594  | 0.75189 |
| 13822  | 0.76016 |
| 13883  | 0.75936 |
| 13736  | 0.75448 |

|        |          |
|--------|----------|
| 13517  | 0.7176   |
| 13270  | 0.73268  |
| 13014  | 0.70591  |
| 12756  | 0.69499  |
| 12500  | 0.66273  |
| 12245  | 0.62831  |
| 11991  | 0.64245  |
| 11738  | 0.62862  |
| 11485  | 0.60528  |
| 11234  | 0.58756  |
| 10982  | 0.56162  |
| 10732  | 0.57107  |
| 10482  | 0.55394  |
| 10232  | 0.52379  |
| 9982.9 | 0.50419  |
| 9733.7 | 0.52639  |
| 9484.9 | 0.52705  |
| 9236   | 0.50257  |
| 8987.5 | 0.47954  |
| 8738.9 | 0.45692  |
| 8490.5 | 0.45606  |
| 8242.1 | 0.44061  |
| 7993.8 | 0.41598  |
| 7745.3 | 0.4194   |
| 7496.7 | 0.38654  |
| 7248.2 | 0.36669  |
| 6999.6 | 0.35792  |
| 6751.3 | 0.33471  |
| 6502.7 | 0.32688  |
| 6254.2 | 0.30891  |
| 6005.7 | 0.27623  |
| 5757   | 0.25689  |
| 5508.1 | 0.25289  |
| 5259.3 | 0.25855  |
| 5010.6 | 0.24228  |
| 4761.8 | 0.21933  |
| 4512.9 | 0.21394  |
| 4264.1 | 0.18495  |
| 4015.5 | 0.1804   |
| 3766.3 | 0.17829  |
| 3517.3 | 0.15218  |
| 3268.1 | 0.12664  |
| 3019.2 | 0.095532 |
| 2770.3 | 0.077256 |
| 2521.2 | 0.051604 |
| 2272.4 | 0.02155  |

|         |          |
|---------|----------|
| 2023.6  | 0.00791  |
| 1774.8  | -0.00756 |
| 1525.9  | -0.0215  |
| 1277    | -0.03906 |
| 1028.4  | -0.0581  |
| 779.02  | -0.06783 |
| 529.31  | -0.09708 |
| 280.49  | -0.13026 |
| 31.625  | -0.17449 |
| -217.04 | -0.23258 |
| -465.89 | -0.26909 |
| -715.2  | -0.29768 |
| -964.49 | -0.33062 |
| -1213.3 | -0.34683 |
| -1462.1 | -0.38345 |
| -1710.5 | -0.41097 |
| -1959.5 | -0.43407 |
| -2208.7 | -0.45142 |
| -2458.1 | -0.47236 |
| -2707.5 | -0.49175 |
| -2956.8 | -0.501   |
| -3205.6 | -0.52766 |
| -3454.3 | -0.55547 |
| -3702.9 | -0.56214 |
| -3951.3 | -0.58238 |
| -4200.6 | -0.59973 |
| -4449.9 | -0.62352 |
| -4699.3 | -0.64229 |
| -4948.6 | -0.6514  |
| -5197.6 | -0.65498 |
| -5446.6 | -0.67644 |
| -5695.4 | -0.70218 |
| -5944.3 | -0.72234 |
| -6192.7 | -0.74746 |
| -6441.1 | -0.76296 |
| -6689.4 | -0.76598 |
| -6937.7 | -0.77965 |
| -7185.7 | -0.8003  |
| -7434.1 | -0.82925 |
| -7682.3 | -0.83523 |
| -7930.5 | -0.86572 |
| -8178.2 | -0.84205 |
| -8426.2 | -0.87209 |
| -8674.3 | -0.86704 |
| -8922.1 | -0.87706 |
| -9169.8 | -0.92665 |

|         |          |
|---------|----------|
| -9417.4 | -0.92906 |
| -9665   | -0.94722 |
| -9912.3 | -0.94294 |
| -10159  | -0.9666  |
| -10406  | -0.99624 |
| -10653  | -1.0148  |
| -10900  | -1.1026  |
| -11146  | -1.0802  |
| -11391  | -1.0142  |
| -11637  | -1.0522  |
| -11882  | -1.0433  |
| -12127  | -1.0859  |
| -12370  | -1.1     |
| -12613  | -1.1031  |
| -12855  | -1.111   |
| -13096  | -1.1099  |
| -13337  | -1.1284  |
| -13577  | -1.1395  |
| -13683  | -1.1578  |
| -13536  | -1.1903  |
| -13315  | -1.1681  |
| -13067  | -1.1461  |
| -12810  | -1.1329  |
| -12552  | -1.1177  |
| -12296  | -1.0971  |
| -12041  | -1.0845  |
| -11787  | -1.0541  |
| -11533  | -1.0477  |
| -11280  | -1.0287  |
| -11028  | -1.0209  |
| -10776  | -1.0123  |
| -10525  | -0.99176 |
| -10275  | -0.97813 |
| -10025  | -0.97237 |
| -9774.9 | -0.96009 |
| -9525.4 | -0.93973 |
| -9275.7 | -0.93522 |
| -9026.4 | -0.9012  |
| -8777.1 | -0.89303 |
| -8528.1 | -0.89628 |
| -8279.1 | -0.87525 |
| -8030.2 | -0.83071 |
| -7780.9 | -0.82397 |
| -7531.7 | -0.79948 |
| -7282.6 | -0.79032 |
| -7033.6 | -0.76862 |

|         |          |
|---------|----------|
| -6784.6 | -0.75466 |
| -6535.6 | -0.74706 |
| -6286.6 | -0.73284 |
| -6037.6 | -0.73498 |
| -5788.1 | -0.7063  |
| -5538.6 | -0.68522 |
| -5289.1 | -0.6798  |
| -5039.5 | -0.6659  |
| -4789.9 | -0.65437 |
| -4539.7 | -0.64326 |
| -4290.1 | -0.61875 |
| -4040.4 | -0.58798 |
| -3791   | -0.57198 |
| -3541.7 | -0.55205 |
| -3292.8 | -0.52198 |
| -3043.7 | -0.50528 |
| -2794.2 | -0.49438 |
| -2544.6 | -0.47248 |
| -2295   | -0.45514 |
| -2045.4 | -0.4345  |
| -1796.4 | -0.42154 |
| -1547.4 | -0.40424 |
| -1299   | -0.37947 |
| -1049.8 | -0.36436 |
| -800.53 | -0.34625 |
| -550.87 | -0.31883 |
| -301.96 | -0.2957  |
| -53.139 | -0.24112 |
| 195.65  | -0.19034 |
| 444.42  | -0.15829 |
| 693.76  | -0.1273  |
| 943.07  | -0.0988  |
| 1191.9  | -0.08227 |
| 1440.7  | -0.06086 |
| 1689.2  | -0.04259 |
| 1938.1  | -0.01844 |
| 2186.8  | 0.020813 |
| 2435.4  | 0.041193 |
| 2684.2  | 0.049672 |
| 2932.9  | 0.066889 |
| 3181.6  | 0.077594 |
| 3430.2  | 0.090512 |
| 3678.9  | 0.10193  |
| 3927.2  | 0.13185  |
| 4175.7  | 0.14588  |
| 4424.2  | 0.15706  |

|        |         |
|--------|---------|
| 4672.4 | 0.17195 |
| 4920.7 | 0.19412 |
| 5168.8 | 0.22277 |
| 5417.1 | 0.25172 |
| 5665.2 | 0.26522 |
| 5913.5 | 0.2569  |
| 6161.4 | 0.28451 |
| 6409.3 | 0.30034 |
| 6657.1 | 0.31439 |
| 6904.6 | 0.31164 |
| 7152.5 | 0.32322 |
| 7400.2 | 0.3438  |
| 7647.8 | 0.37987 |
| 7895.5 | 0.40424 |
| 8143   | 0.39309 |
| 8390.2 | 0.40347 |
| 8637.4 | 0.44981 |
| 8884.5 | 0.4499  |
| 9131.5 | 0.46728 |
| 9378.5 | 0.48248 |
| 9625.3 | 0.49842 |
| 9871.9 | 0.51637 |
| 10119  | 0.52399 |
| 10365  | 0.53216 |
| 10611  | 0.55151 |
| 10857  | 0.55108 |
| 11102  | 0.55982 |
| 11347  | 0.57149 |
| 11592  | 0.59415 |
| 11837  | 0.61497 |
| 12081  | 0.62796 |
| 12323  | 0.64617 |
| 12566  | 0.65506 |
| 12808  | 0.66134 |
| 13049  | 0.68034 |
| 13289  | 0.65891 |
| 13529  | 0.64524 |
| 13766  | 0.65204 |



## Hysteresis loop measurement experiment results for Co(3-butenyl-1-picolyimidazolin-2-ylidene)<sub>2</sub>Cl<sub>2</sub> (3e)

Start Time: 9/3/2014 2:00:04 PM Time Completed: 9/3/2014

3:00:46 PM Elapsed Time: 01:00:41

Sample ID: Bu-CoCl<sub>2</sub>

Experiment: C:\IDEASVSM\Default

UserID\Experiments\Hafiz\Hafiz.exp

Data File: C:\IDEASVSM\Default UserID\IbrahimH\Bu-CoCl<sub>2</sub>.txt

Plot File: C:\IDEASVSM\Default UserID\IbrahimH\Bu-CoCl<sub>2</sub>.oc2

VSM Exp File: C:\IDEASVSM\Default

UserID\Experiments\Hafiz\Hafiz.stp

VSM Data File: C:\IDEASVSM\Default UserID\IbrahimH\Bu-CoCl<sub>2</sub>.dat

\*\*\*DATA\*\*\*

Coercivity

(Hci) 142.96 G

Mr, -0.19971

Negative emu/g

Mr, -0.17298

Positive emu/g

Ms, -1.0983

Negative emu/g

Ms, 0.68512

Positive emu/g

Squareness 1.50E-02

| Field(G) | Moment/Mass(emu/g) |
|----------|--------------------|
|----------|--------------------|

|       |          |
|-------|----------|
| 56.45 | -0.16726 |
|-------|----------|

|        |          |
|--------|----------|
| 257.23 | -0.12742 |
|--------|----------|

|        |         |
|--------|---------|
| 501.27 | -0.1071 |
|--------|---------|

|       |          |
|-------|----------|
| 752.1 | -0.09127 |
|-------|----------|

|        |          |
|--------|----------|
| 1003.5 | -0.07053 |
|--------|----------|

|        |          |
|--------|----------|
| 1253.8 | -0.04751 |
|--------|----------|

|        |          |
|--------|----------|
| 1503.8 | -0.01835 |
|--------|----------|

|        |          |
|--------|----------|
| 1753.6 | -0.00359 |
|--------|----------|

|        |          |
|--------|----------|
| 2003.2 | 0.009746 |
|--------|----------|

|        |          |
|--------|----------|
| 2252.5 | 0.029005 |
|--------|----------|

|        |          |
|--------|----------|
| 2501.8 | 0.046828 |
|--------|----------|

|        |          |
|--------|----------|
| 2750.7 | 0.083359 |
|--------|----------|

|        |         |
|--------|---------|
| 2999.6 | 0.19305 |
|--------|---------|

|        |         |
|--------|---------|
| 3248.5 | 0.23749 |
|--------|---------|

|        |         |
|--------|---------|
| 3497.1 | 0.19736 |
|--------|---------|

|        |         |
|--------|---------|
| 3745.6 | 0.18771 |
|--------|---------|

|        |         |
|--------|---------|
| 3993.9 | 0.18365 |
|--------|---------|

|        |         |
|--------|---------|
| 4242.1 | 0.19256 |
| 4490.3 | 0.21607 |
| 4738.3 | 0.23663 |
| 4986.3 | 0.23887 |
| 5234.4 | 0.2676  |
| 5482.4 | 0.26347 |
| 5730.5 | 0.28513 |
| 5978.6 | 0.28081 |
| 6226.4 | 0.29225 |
| 6474.1 | 0.3207  |
| 6721.8 | 0.32684 |
| 6969.5 | 0.34966 |
| 7217.1 | 0.35396 |
| 7464.9 | 0.36638 |
| 7712.4 | 0.38321 |
| 7959.9 | 0.40905 |
| 8207.3 | 0.41989 |
| 8454.5 | 0.43235 |
| 8701.7 | 0.44488 |
| 8948.7 | 0.44634 |
| 9195.7 | 0.46619 |
| 9442.5 | 0.46908 |
| 9689.2 | 0.47576 |
| 9935.8 | 0.48734 |
| 10182  | 0.50085 |
| 10428  | 0.51208 |
| 10674  | 0.53339 |
| 10920  | 0.54126 |
| 11165  | 0.55478 |
| 11410  | 0.54812 |
| 11655  | 0.57114 |
| 11900  | 0.58306 |
| 12144  | 0.59811 |
| 12387  | 0.62492 |
| 12629  | 0.65937 |
| 12871  | 0.63991 |
| 13112  | 0.63649 |
| 13352  | 0.65968 |
| 13592  | 0.65119 |
| 13821  | 0.67226 |
| 13888  | 0.68512 |
| 13745  | 0.6846  |
| 13527  | 0.66005 |
| 13281  | 0.64839 |
| 13025  | 0.6181  |
| 12768  | 0.60674 |

|        |          |
|--------|----------|
| 12511  | 0.62113  |
| 12256  | 0.58028  |
| 12002  | 0.57669  |
| 11749  | 0.58354  |
| 11497  | 0.56664  |
| 11245  | 0.52957  |
| 10993  | 0.51158  |
| 10743  | 0.51761  |
| 10493  | 0.48929  |
| 10243  | 0.47418  |
| 9993.9 | 0.46753  |
| 9744.7 | 0.44608  |
| 9495.9 | 0.42737  |
| 9247.2 | 0.42815  |
| 8998.5 | 0.399    |
| 8750   | 0.39295  |
| 8501.5 | 0.37134  |
| 8253.2 | 0.35897  |
| 8004.9 | 0.34439  |
| 7756.4 | 0.33675  |
| 7507.7 | 0.32557  |
| 7259.3 | 0.31678  |
| 7010.7 | 0.29603  |
| 6762.3 | 0.27884  |
| 6513.8 | 0.26262  |
| 6265.3 | 0.25663  |
| 6016.7 | 0.24673  |
| 5768   | 0.24114  |
| 5519.2 | 0.22025  |
| 5270.5 | 0.2006   |
| 5021.6 | 0.18487  |
| 4772.9 | 0.17161  |
| 4523.9 | 0.14201  |
| 4275.2 | 0.13116  |
| 4026.6 | 0.11322  |
| 3777.6 | 0.10169  |
| 3528.2 | 0.081004 |
| 3279.3 | 0.067449 |
| 3030.2 | 0.05002  |
| 2781.3 | 0.037636 |
| 2532.4 | 0.02102  |
| 2283.5 | -0.00309 |
| 2034.7 | -0.02096 |
| 1785.8 | -0.04507 |
| 1537   | -0.05509 |
| 1288.2 | -0.05903 |

|         |          |
|---------|----------|
| 1039.5  | -0.08707 |
| 789.98  | -0.11286 |
| 540.42  | -0.13499 |
| 291.55  | -0.14309 |
| 42.745  | -0.16878 |
| -206.04 | -0.1932  |
| -454.82 | -0.22062 |
| -703.98 | -0.25507 |
| -953.41 | -0.28188 |
| -1202.3 | -0.3082  |
| -1451.1 | -0.33908 |
| -1699.5 | -0.35444 |
| -1948.3 | -0.36307 |
| -2197.5 | -0.3842  |
| -2447   | -0.41227 |
| -2696.4 | -0.42162 |
| -2945.7 | -0.43838 |
| -3194.6 | -0.45952 |
| -3443.2 | -0.46606 |
| -3691.9 | -0.47448 |
| -3940.3 | -0.48641 |
| -4189.5 | -0.49444 |
| -4438.8 | -0.49239 |
| -4688.2 | -0.52829 |
| -4937.5 | -0.54648 |
| -5186.4 | -0.57226 |
| -5435.5 | -0.57805 |
| -5684.3 | -0.60152 |
| -5933.2 | -0.61379 |
| -6181.7 | -0.61673 |
| -6430.1 | -0.63312 |
| -6678.3 | -0.64292 |
| -6926.5 | -0.66836 |
| -7174.8 | -0.67578 |
| -7423.1 | -0.6737  |
| -7671.2 | -0.69128 |
| -7919.4 | -0.72516 |
| -8167.3 | -0.71974 |
| -8415.2 | -0.74008 |
| -8663.2 | -0.76089 |
| -8911   | -0.76571 |
| -9158.7 | -0.77888 |
| -9406.4 | -0.78809 |
| -9654   | -0.80072 |
| -9901.3 | -0.80918 |
| -10148  | -0.81574 |

|         |          |
|---------|----------|
| -10395  | -0.81897 |
| -10642  | -0.84365 |
| -10889  | -0.84132 |
| -11135  | -0.85788 |
| -11381  | -0.87336 |
| -11626  | -0.89548 |
| -11871  | -0.91476 |
| -12116  | -0.97355 |
| -12359  | -1.0171  |
| -12602  | -1.0413  |
| -12844  | -1.0618  |
| -13086  | -1.0685  |
| -13326  | -1.0727  |
| -13567  | -1.0934  |
| -13674  | -1.0983  |
| -13527  | -1.0885  |
| -13307  | -1.0815  |
| -13059  | -1.036   |
| -12802  | -0.95964 |
| -12545  | -0.95058 |
| -12288  | -0.96384 |
| -12033  | -0.97694 |
| -11779  | -0.92593 |
| -11525  | -0.92361 |
| -11272  | -0.8796  |
| -11020  | -0.86027 |
| -10769  | -0.85523 |
| -10518  | -0.84544 |
| -10267  | -0.84523 |
| -10017  | -0.81486 |
| -9767.4 | -0.80523 |
| -9517.7 | -0.8036  |
| -9268.4 | -0.79088 |
| -9018.9 | -0.78408 |
| -8769.7 | -0.77158 |
| -8520.5 | -0.76206 |
| -8271.6 | -0.74891 |
| -8022.8 | -0.7283  |
| -7773.5 | -0.70708 |
| -7524.2 | -0.70748 |
| -7275.2 | -0.67384 |
| -7026.1 | -0.68143 |
| -6777.3 | -0.67176 |
| -6528   | -0.65834 |
| -6279.1 | -0.63336 |
| -6030   | -0.6119  |

|         |          |
|---------|----------|
| -5780.6 | -0.60272 |
| -5531.1 | -0.59932 |
| -5281.6 | -0.59767 |
| -5032   | -0.57142 |
| -4782.3 | -0.54798 |
| -4532.3 | -0.52454 |
| -4282.5 | -0.50451 |
| -4032.9 | -0.49159 |
| -3783.6 | -0.47392 |
| -3534.3 | -0.4666  |
| -3285.3 | -0.4545  |
| -3036.2 | -0.43146 |
| -2786.8 | -0.40915 |
| -2537   | -0.40121 |
| -2287.5 | -0.38255 |
| -2038   | -0.36356 |
| -1788.9 | -0.35338 |
| -1540.1 | -0.33783 |
| -1291.1 | -0.3082  |
| -1042.5 | -0.28895 |
| -792.93 | -0.27601 |
| -543.41 | -0.25081 |
| -294.61 | -0.2328  |
| -45.656 | -0.20609 |
| 203.1   | -0.17131 |
| 451.98  | -0.13824 |
| 701.22  | -0.11331 |
| 950.5   | -0.08301 |
| 1199.5  | -0.07461 |
| 1448    | -0.04579 |
| 1696.8  | -0.02759 |
| 1945.6  | -0.00845 |
| 2194.2  | 0.016621 |
| 2443    | 0.026952 |
| 2691.6  | 0.04036  |
| 2940.4  | 0.048532 |
| 3188.9  | 0.06352  |
| 3437.7  | 0.070753 |
| 3686.3  | 0.084913 |
| 3934.7  | 0.097802 |
| 4183.2  | 0.11018  |
| 4431.5  | 0.11986  |
| 4679.9  | 0.14273  |
| 4928.1  | 0.15927  |
| 5176.3  | 0.18446  |
| 5424.6  | 0.20551  |

|        |          |
|--------|----------|
| 5672.6 | 0.22414  |
| 5921   | 0.23478  |
| 6168.8 | 0.22763  |
| 6416.7 | 0.23966  |
| 6664.4 | 0.25244  |
| 6912.1 | 0.26871  |
| 7159.8 | 0.29479  |
| 7407.7 | 0.30161  |
| 7655.3 | 0.30237  |
| 7902.9 | 0.30674  |
| 8150.4 | 0.33079  |
| 8397.7 | 0.35741  |
| 8644.7 | 0.3633   |
| 8891.9 | 0.36882  |
| 9139   | 0.39129  |
| 9385.9 | 0.39842  |
| 9632.7 | 0.40632  |
| 9879.4 | 0.42179  |
| 10126  | 0.44703  |
| 10372  | 0.4622   |
| 10618  | 0.52668  |
| 10864  | 0.53816  |
| 11110  | 0.55588  |
| 11355  | 0.52187  |
| 11600  | 0.51019  |
| 11844  | 0.52464  |
| 12088  | 0.52823  |
| 12331  | 0.53997  |
| 12573  | 0.55898  |
| 12815  | 0.56256  |
| 13056  | 0.58123  |
| 13296  | 0.59792  |
| 13536  | 0.31225  |
| 13772  | -0.41121 |
